# Supplementary material for: In silico characterisation of the two-component system regulators of Streptococcus pyogenes
Source: PLoS One. 2018 Jun 21;13(6):e0199163. doi: 10.1371/journal.pone.0199163 (PMC6013163; doi:10.1371/journal.pone.0199163)
Supplement: S1 Table — (XLSX) [file pone.0199163.s001.xlsx]

## Sheet: Published draft genomes
Index	Sanger_tag	Strain	Country	Year	Clinical (if known)	EMM + EMM-like	EMM	EMM cluster	MLST	Reference
1	SRR1104742	NGAS005	Canada	2010-2013		EMM90.2,	EMM90.2	E2	ST184	Athey J. Clin. Microbiol. 2014, 52(6):1871
2	SRR1104963	NGAS008	Canada	2010-2013		EMM122.2,	EMM122.2	M122	ST256~	Athey J. Clin. Microbiol. 2014, 52(6):1871
3	SRR1104964	NGAS015	Canada	2010-2013		EMM63.3,	EMM63.3	E6	ST297	Athey J. Clin. Microbiol. 2014, 52(6):1871
4	SRR1104965	NGAS025	Canada	2010-2013		EMM89.0,EMM203.3	EMM89.0	E4	ST101	Athey J. Clin. Microbiol. 2014, 52(6):1871
5	SRR1104966	NGAS026	Canada	2010-2013		EMM89.0,EMM203.3	EMM89.0	E4	ST101	Athey J. Clin. Microbiol. 2014, 52(6):1871
6	SRR1104967	NGAS035	Canada	2010-2013		EMM1.0,	EMM1.0	A-C3	ST28~	Athey J. Clin. Microbiol. 2014, 52(6):1871
7	SRR1104970	NGAS056	Canada	2010-2013		EMM1.0,	EMM1.0	A-C3	ST28	Athey J. Clin. Microbiol. 2014, 52(6):1871
8	SRR1104971	NGAS057	Canada	2010-2013		EMM88.3,	EMM88.3	E4	ST352~	Athey J. Clin. Microbiol. 2014, 52(6):1871
9	SRR1104972	NGAS061	Canada	2010-2013		EMM1.0,	EMM1.0	A-C3	ST28	Athey J. Clin. Microbiol. 2014, 52(6):1871
10	SRR1104973	NGAS070	Canada	2010-2013		EMM89.0,EMM203.3	EMM89.0	E4	ST101	Athey J. Clin. Microbiol. 2014, 52(6):1871
11	SRR1104974	NGAS071	Canada	2010-2013		EMM87.0,	EMM87.0	E3	ST62	Athey J. Clin. Microbiol. 2014, 52(6):1871
12	SRR1104975	NGAS075	Canada	2010-2013		EMM9.0,EMM203.3	EMM9.0	E3	ST75	Athey J. Clin. Microbiol. 2014, 52(6):1871
13	SRR1104976	NGAS076	Canada	2010-2013		EMM1.0,	EMM1.0	A-C3	ST28	Athey J. Clin. Microbiol. 2014, 52(6):1871
14	SRR1104977	NGAS078	Canada	2010-2013		EMM1.0,	EMM1.0	A-C3	ST28	Athey J. Clin. Microbiol. 2014, 52(6):1871
15	SRR1104978	NGAS083	Canada	2010-2013		EMM1.0,	EMM1.0	A-C3	ST28	Athey J. Clin. Microbiol. 2014, 52(6):1871
16	SRR1104979	NGAS084	Canada	2010-2013		EMM28.0,	EMM28.0	E4	ST52	Athey J. Clin. Microbiol. 2014, 52(6):1871
17	SRR1104980	NGAS088	Canada	2010-2013		EMM89.0,EMM203.3	EMM89.0	E4	ST101	Athey J. Clin. Microbiol. 2014, 52(6):1871
18	SRR1104981	NGAS094	Canada	2010-2013		EMM3.1,	EMM3.1	A-C5	ST15	Athey J. Clin. Microbiol. 2014, 52(6):1871
19	SRR1104982	NGAS096	Canada	2010-2013		EMM12.0,	EMM12.0	A-C4	ST36	Athey J. Clin. Microbiol. 2014, 52(6):1871
20	SRR1104983	NGAS100	Canada	2010-2013		EMM3.1,	EMM3.1	A-C5	ST15	Athey J. Clin. Microbiol. 2014, 52(6):1871
21	SRR1105864	NGAS104	Canada	2010-2013		EMM3.53,	EMM3.53	A-C5	ST406	Athey J. Clin. Microbiol. 2014, 52(6):1871
22	SRR1105865	NGAS113	Canada	2010-2013		EMM122.0,	EMM122.0	M122	ST200	Athey J. Clin. Microbiol. 2014, 52(6):1871
23	SRR1105866	NGAS123	Canada	2010-2013		EMM6.79,	EMM6.79	M6	ST382	Athey J. Clin. Microbiol. 2014, 52(6):1871
24	SRR1105867	NGAS128	Canada	2010-2013		EMM14.3,EMM51.0	EMM14.3	M14	ST84	Athey J. Clin. Microbiol. 2014, 52(6):1871
25	SRR1105868	NGAS130	Canada	2010-2013		EMM191.0,	EMM191.0	E6	ST208	Athey J. Clin. Microbiol. 2014, 52(6):1871
26	SRR1105869	NGAS145	Canada	2010-2013		EMM12.0,	EMM12.0	A-C4	ST36	Athey J. Clin. Microbiol. 2014, 52(6):1871
27	SRR1105870	NGAS148	Canada	2010-2013		New	New		ST99	Athey J. Clin. Microbiol. 2014, 52(6):1871
28	SRR1105871	NGAS151	Canada	2010-2013		EMM6.0,	EMM6.0	M6	ST382	Athey J. Clin. Microbiol. 2014, 52(6):1871
29	SRR1105872	NGAS162	Canada	2010-2013		EMM6.0,	EMM6.0	M6	ST382	Athey J. Clin. Microbiol. 2014, 52(6):1871
30	SRR1105874	NGAS169	Canada	2010-2013		EMM77.0,EMM159.0	EMM77.0	E4	ST63	Athey J. Clin. Microbiol. 2014, 52(6):1871
31	SRR1105875	NGAS185	Canada	2010-2013		EMM12.8,	EMM12.8	A-C4	ST36	Athey J. Clin. Microbiol. 2014, 52(6):1871
32	SRR1105876	NGAS187	Canada	2010-2013		EMM82.0,	EMM82.0	E3	ST334	Athey J. Clin. Microbiol. 2014, 52(6):1871
33	SRR1105877	NGAS197	Canada	2010-2013		EMM89.0,EMM203.3	EMM89.0	E4	ST101	Athey J. Clin. Microbiol. 2014, 52(6):1871
34	SRR1105878	NGAS202	Canada	2010-2013		EMM1.0,	EMM1.0	A-C3	ST28	Athey J. Clin. Microbiol. 2014, 52(6):1871
35	SRR1105879	NGAS209	Canada	2010-2013		EMM205.0,EMM18.0	EMM18.0	M18	ST41~	Athey J. Clin. Microbiol. 2014, 52(6):1871
36	SRR1105880	NGAS226	Canada	2010-2013		EMM149.2,EMM2.0	EMM2.0	E4	ST55	Athey J. Clin. Microbiol. 2014, 52(6):1871
37	SRR1105881	NGAS227	Canada	2010-2013		EMM102.2,	EMM102.2	E4	ST376~	Athey J. Clin. Microbiol. 2014, 52(6):1871
38	SRR1105882	NGAS228	Canada	2010-2013		EMM4.0,EMM156.0	EMM4.0	E1	ST39	Athey J. Clin. Microbiol. 2014, 52(6):1871
39	SRR1105883	NGAS233	Canada	2010-2013		EMM89.0,EMM203.3	EMM89.0	E4	ST101	Athey J. Clin. Microbiol. 2014, 52(6):1871
40	SRR1105884	NGAS240	Canada	2010-2013		EMM82.0,	EMM82.0	E3	ST334	Athey J. Clin. Microbiol. 2014, 52(6):1871
41	SRR1105886	NGAS245	Canada	2010-2013		EMM58.0,EMM236.1	EMM58.0	E3	ST176	Athey J. Clin. Microbiol. 2014, 52(6):1871
42	SRR1105887	NGAS253	Canada	2010-2013		EMM83.1,	EMM83.1	D4	ST853	Athey J. Clin. Microbiol. 2014, 52(6):1871
43	SRR1105888	NGAS255	Canada	2010-2013		EMM1.0,	EMM1.0	A-C3	ST28	Athey J. Clin. Microbiol. 2014, 52(6):1871
44	SRR1105889	NGAS260	Canada	2010-2013		EMM12.8,	EMM12.8	A-C4	ST36	Athey J. Clin. Microbiol. 2014, 52(6):1871
45	SRR1105890	NGAS266	Canada	2010-2013		EMM3.1,	EMM3.1	A-C5	ST15	Athey J. Clin. Microbiol. 2014, 52(6):1871
46	SRR1105891	NGAS282	Canada	2010-2013		EMM89.0,EMM203.3	EMM89.0	E4	ST101	Athey J. Clin. Microbiol. 2014, 52(6):1871
47	SRR1105892	NGAS287	Canada	2010-2013		EMM6.0,	EMM6.0	M6	ST382	Athey J. Clin. Microbiol. 2014, 52(6):1871
48	SRR1105893	NGAS289	Canada	2010-2013		EMM6.0,	EMM6.0	M6	ST382	Athey J. Clin. Microbiol. 2014, 52(6):1871
49	SRR1105894	NGAS290	Canada	2010-2013		EMM87.0,	EMM87.0	E3	ST62	Athey J. Clin. Microbiol. 2014, 52(6):1871
50	SRR1105895	NGAS291	Canada	2010-2013		EMM87.0,	EMM87.0	E3	ST62	Athey J. Clin. Microbiol. 2014, 52(6):1871
51	SRR1105896	NGAS292	Canada	2010-2013		EMM87.0,	EMM87.0	E3	ST62	Athey J. Clin. Microbiol. 2014, 52(6):1871
52	SRR1105898	NGAS297	Canada	2010-2013		EMM1.0,	EMM1.0	A-C3	ST28	Athey J. Clin. Microbiol. 2014, 52(6):1871
53	SRR1105899	NGAS298	Canada	2010-2013		EMM87.0,	EMM87.0	E3	ST62	Athey J. Clin. Microbiol. 2014, 52(6):1871
54	SRR1105900	NGAS299	Canada	2010-2013		EMM87.0,	EMM87.0	E3	ST62	Athey J. Clin. Microbiol. 2014, 52(6):1871
55	SRR1105901	NGAS300	Canada	2010-2013		EMM240.1,EMM83.1	EMM83.1	D4	ST5	Athey J. Clin. Microbiol. 2014, 52(6):1871
56	SRR1105902	NGAS302	Canada	2010-2013		EMM28.0,	EMM28.0	E4	ST52	Athey J. Clin. Microbiol. 2014, 52(6):1871
57	SRR1105903	NGAS304	Canada	2010-2013		EMM28.0,	EMM28.0	E4	ST52	Athey J. Clin. Microbiol. 2014, 52(6):1871
58	SRR1105904	NGAS305	Canada	2010-2013		EMM1.0,	EMM1.0	A-C3	ST28	Athey J. Clin. Microbiol. 2014, 52(6):1871
59	SRR1105905	NGAS306	Canada	2010-2013		EMM83.1,	EMM83.1	D4	ST853	Athey J. Clin. Microbiol. 2014, 52(6):1871
60	SRR1105906	NGAS308	Canada	2010-2013		EMM205.0,EMM18.0	EMM18.0	M18	ST41~	Athey J. Clin. Microbiol. 2014, 52(6):1871
61	SRR1105907	NGAS311	Canada	2010-2013		EMM118.0,EMM236.1	EMM118.0	E3	ST167	Athey J. Clin. Microbiol. 2014, 52(6):1871
62	SRR1105908	NGAS312	Canada	2010-2013		EMM80.0,	EMM80.0	D4	ST538	Athey J. Clin. Microbiol. 2014, 52(6):1871
63	SRR1105909	NGAS316	Canada	2010-2013		EMM83.1,EMM240.1	EMM83.1	D4	ST5	Athey J. Clin. Microbiol. 2014, 52(6):1871
64	SRR1105910	NGAS317	Canada	2010-2013		EMM82.0,	EMM82.0	E3	ST334	Athey J. Clin. Microbiol. 2014, 52(6):1871
65	SRR1105912	NGAS320	Canada	2010-2013		EMM83.1,	EMM83.1	D4	ST853	Athey J. Clin. Microbiol. 2014, 52(6):1871
66	SRR1105914	NGAS322	Canada	2010-2013		EMM159.0,EMM114.0	EMM114.0	E4	ST188	Athey J. Clin. Microbiol. 2014, 52(6):1871
67	SRR1105915	NGAS323	Canada	2010-2013		EMM82.0,	EMM82.0	E3	ST334	Athey J. Clin. Microbiol. 2014, 52(6):1871
68	SRR1105916	NGAS325	Canada	2010-2013		EMM22.0,EMM156.0	EMM22.0	E4	ST46~	Athey J. Clin. Microbiol. 2014, 52(6):1871
69	SRR1105917	NGAS328	Canada	2010-2013		EMM82.0,	EMM82.0	E3	ST334	Athey J. Clin. Microbiol. 2014, 52(6):1871
70	SRR1105918	NGAS330	Canada	2010-2013		EMM41.2,EMM156.0,EMM41.4	EMM41.2	D4	ST579	Athey J. Clin. Microbiol. 2014, 52(6):1871
71	SRR1105919	NGAS332	Canada	2010-2013		EMM82.0,	EMM82.0	E3	ST334	Athey J. Clin. Microbiol. 2014, 52(6):1871
72	SRR1105920	NGAS334	Canada	2010-2013		EMM115.0,	EMM115.0	D2	ST135	Athey J. Clin. Microbiol. 2014, 52(6):1871
73	SRR1105921	NGAS335	Canada	2010-2013		EMM87.0,	EMM87.0	E3	ST62	Athey J. Clin. Microbiol. 2014, 52(6):1871
74	SRR1105922	NGAS336	Canada	2010-2013		EMM1.0,	EMM1.0	A-C3	ST28	Athey J. Clin. Microbiol. 2014, 52(6):1871
75	SRR1105924	NGAS338	Canada	2010-2013		EMM82.0,	EMM82.0	E3	ST334	Athey J. Clin. Microbiol. 2014, 52(6):1871
76	SRR1105925	NGAS339	Canada	2010-2013		EMM174.1,EMM59.0	EMM59.0	E6	ST172	Athey J. Clin. Microbiol. 2014, 52(6):1871
77	SRR1105926	NGAS340	Canada	2010-2013		EMM118.0,EMM236.1	EMM118.0	E3	ST167	Athey J. Clin. Microbiol. 2014, 52(6):1871
78	SRR1105927	NGAS341	Canada	2010-2013		EMM87.0,	EMM87.0	E3	ST62	Athey J. Clin. Microbiol. 2014, 52(6):1871
79	SRR1105928	NGAS344	Canada	2010-2013		EMM170.0,EMM75.0	EMM75.0	E6	ST49	Athey J. Clin. Microbiol. 2014, 52(6):1871
80	SRR1105929	NGAS345	Canada	2010-2013		EMM82.0,	EMM82.0	E3	ST334	Athey J. Clin. Microbiol. 2014, 52(6):1871
81	SRR1105930	NGAS346	Canada	2010-2013		EMM41.2,EMM156.0,EMM41.4	EMM41.2	D4	ST579	Athey J. Clin. Microbiol. 2014, 52(6):1871
82	SRR1105931	NGAS347	Canada	2010-2013		EMM82.0,	EMM82.0	E3	ST334	Athey J. Clin. Microbiol. 2014, 52(6):1871
83	SRR1105932	NGAS353	Canada	2010-2013		EMM58.0,EMM236.1	EMM58.0	E3	ST176	Athey J. Clin. Microbiol. 2014, 52(6):1871
84	SRR1105933	NGAS358	Canada	2010-2013		EMM169.3,EMM164.2	EMM169.3	E4	ST53	Athey J. Clin. Microbiol. 2014, 52(6):1871
85	SRR1105934	NGAS364	Canada	2010-2013		EMM77.0,EMM159.0	EMM77.0	E4	ST63	Athey J. Clin. Microbiol. 2014, 52(6):1871
86	SRR1105935	NGAS367	Canada	2010-2013		EMM169.3,EMM164.2	EMM169.3	E4	ST53	Athey J. Clin. Microbiol. 2014, 52(6):1871
87	SRR1105936	NGAS372	Canada	2010-2013		EMM92.0,	EMM92.0	E2	ST82	Athey J. Clin. Microbiol. 2014, 52(6):1871
88	SRR1105937	NGAS401	Canada	2010-2013		EMM102.2,	EMM102.2	E4	ST376~	Athey J. Clin. Microbiol. 2014, 52(6):1871
89	SRR1105938	NGAS408	Canada	2010-2013		EMM1.0,	EMM1.0	A-C3	ST28	Athey J. Clin. Microbiol. 2014, 52(6):1871
90	SRR1105939	NGAS413	Canada	2010-2013		EMM1.0,	EMM1.0	A-C3	ST28	Athey J. Clin. Microbiol. 2014, 52(6):1871
91	SRR1105940	NGAS419	Canada	2010-2013		EMM3.1,	EMM3.1	A-C5	ST15	Athey J. Clin. Microbiol. 2014, 52(6):1871
92	SRR1105941	NGAS425	Canada	2010-2013		EMM1.0,	EMM1.0	A-C3	ST28	Athey J. Clin. Microbiol. 2014, 52(6):1871
93	SRR1105942	NGAS426	Canada	2010-2013		EMM3.1,	EMM3.1	A-C5	ST15	Athey J. Clin. Microbiol. 2014, 52(6):1871
94	SRR1105943	NGAS428	Canada	2010-2013		EMM5.14,	EMM5.14	M5	ST99	Athey J. Clin. Microbiol. 2014, 52(6):1871
95	SRR1105944	NGAS438	Canada	2010-2013		EMM73.0,	EMM73.0	E4	ST331	Athey J. Clin. Microbiol. 2014, 52(6):1871
96	SRR1105945	NGAS440	Canada	2010-2013		EMM29.2,	EMM9.2	E3	ST12	Athey J. Clin. Microbiol. 2014, 52(6):1871
97	SRR1105946	NGAS447	Canada	2010-2013		EMM12.0,	EMM12.0	A-C4	ST36	Athey J. Clin. Microbiol. 2014, 52(6):1871
98	SRR1105947	NGAS450	Canada	2010-2013		EMM1.0,	EMM1.0	A-C3	ST28	Athey J. Clin. Microbiol. 2014, 52(6):1871
99	SRR1105948	NGAS465	Canada	2010-2013		EMM29.1,	EMM29.1	M29	ST12	Athey J. Clin. Microbiol. 2014, 52(6):1871
100	SRR1105949	NGAS473	Canada	2010-2013		EMM82.0,	EMM82.0	E3	ST36	Athey J. Clin. Microbiol. 2014, 52(6):1871
101	SRR1105950	NGAS474	Canada	2010-2013		EMM87.0,	EMM87.0	E3	ST62	Athey J. Clin. Microbiol. 2014, 52(6):1871
102	SRR1105951	NGAS481	Canada	2010-2013		EMM82.0,	EMM82.0	E3	ST334	Athey J. Clin. Microbiol. 2014, 52(6):1871
103	SRR1105952	NGAS490	Canada	2010-2013		EMM87.0,	EMM87.0	E3	ST62	Athey J. Clin. Microbiol. 2014, 52(6):1871
104	SRR1105953	NGAS493	Canada	2010-2013		EMM156.0,EMM4.0	EMM4.0	E1	ST39	Athey J. Clin. Microbiol. 2014, 52(6):1871
105	SRR1105954	NGAS495	Canada	2010-2013		EMM82.0,	EMM82.0	E3	ST334	Athey J. Clin. Microbiol. 2014, 52(6):1871
106	SRR1105955	NGAS500	Canada	2010-2013		EMM73.0,EMM149.2	EMM73.0	E4	ST331	Athey J. Clin. Microbiol. 2014, 52(6):1871
107	SRR1105956	NGAS501	Canada	2010-2013		EMM82.0,	EMM82.0	E3	ST334	Athey J. Clin. Microbiol. 2014, 52(6):1871
108	SRR1105958	NGAS508	Canada	2010-2013		EMM87.0,	EMM87.0	E3	ST62	Athey J. Clin. Microbiol. 2014, 52(6):1871
109	SRR1105959	NGAS510	Canada	2010-2013		EMM9.2,	EMM9.2	E3	ST75~	Athey J. Clin. Microbiol. 2014, 52(6):1871
110	SRR1105960	NGAS516	Canada	2010-2013		EMM89.0,EMM203.3	EMM89.0	E4	ST101	Athey J. Clin. Microbiol. 2014, 52(6):1871
111	SRR1105961	NGAS520	Canada	2010-2013		EMM240.1,EMM83.1	EMM83.1	D4	ST5	Athey J. Clin. Microbiol. 2014, 52(6):1871
112	SRR1105962	NGAS524	Canada	2010-2013		EMM89.0,EMM203.3	EMM89.0	E4	ST101	Athey J. Clin. Microbiol. 2014, 52(6):1871
113	SRR1105963	NGAS532	Canada	2010-2013		EMM202.1,EMM11.0	EMM11.0	E6	ST20~	Athey J. Clin. Microbiol. 2014, 52(6):1871
114	SRR1105964	NGAS535	Canada	2010-2013		EMM138.0,EMM192.0	EMM192	D4	ST260~	Athey J. Clin. Microbiol. 2014, 52(6):1871
115	SRR1105965	NGAS549	Canada	2010-2013		EMM89.0,EMM203.3	EMM89.0	E4	ST580	Athey J. Clin. Microbiol. 2014, 52(6):1871
116	SRR1105966	NGAS556	Canada	2010-2013		EMM87.0,	EMM87.0	E3	ST62	Athey J. Clin. Microbiol. 2014, 52(6):1871
117	SRR1105967	NGAS565	Canada	2010-2013		EMM87.0,	EMM87.0	E3	ST62	Athey J. Clin. Microbiol. 2014, 52(6):1871
118	SRR1105968	NGAS592	Canada	2010-2013		EMM82.0,	EMM82.0	E3	ST334	Athey J. Clin. Microbiol. 2014, 52(6):1871
119	SRR1105969	NGAS594	Canada	2010-2013		EMM82.0,	EMM82.0	E3	ST334	Athey J. Clin. Microbiol. 2014, 52(6):1871
120	SRR1105971	NGAS596	Canada	2010-2013		EMM82.0,	EMM82.0	E3	ST334	Athey J. Clin. Microbiol. 2014, 52(6):1871
121	SRR1105972	NGAS597	Canada	2010-2013		EMM82.0,	EMM82.0	E3	ST334	Athey J. Clin. Microbiol. 2014, 52(6):1871
122	SRR1105973	NGAS599	Canada	2010-2013		EMM114.1,EMM159.0	EMM114.1	E4	ST188	Athey J. Clin. Microbiol. 2014, 52(6):1871
123	SRR1105974	NGAS601	Canada	2010-2013		EMM82.0,	EMM82.0	E3	ST334	Athey J. Clin. Microbiol. 2014, 52(6):1871
124	SRR1105975	NGAS603	Canada	2010-2013		EMM6.0,	EMM6.0	M6	ST382	Athey J. Clin. Microbiol. 2014, 52(6):1871
125	SRR1105976	NGAS604	Canada	2010-2013		EMM170.0,EMM75.0	EMM75.0	E6	ST49	Athey J. Clin. Microbiol. 2014, 52(6):1871
126	SRR1105978	NGAS606	Canada	2010-2013		EMM80.0,	EMM80.0	D4	ST538	Athey J. Clin. Microbiol. 2014, 52(6):1871
127	SRR1105979	NGAS608	Canada	2010-2013		EMM82.0,	EMM82.0	E3	ST334	Athey J. Clin. Microbiol. 2014, 52(6):1871
128	SRR1105980	NGAS609	Canada	2010-2013		EMM82.0,	EMM82.0	E3	ST334	Athey J. Clin. Microbiol. 2014, 52(6):1871
129	SRR1105981	NGAS610	Canada	2010-2013		EMM87.0,	EMM87.0	E3	ST62	Athey J. Clin. Microbiol. 2014, 52(6):1871
130	SRR1105982	NGAS612	Canada	2010-2013		EMM87.0,	EMM87.0	E3	ST62	Athey J. Clin. Microbiol. 2014, 52(6):1871
131	SRR1105983	NGAS613	Canada	2010-2013		EMM82.0,	EMM82.0	E3	ST334	Athey J. Clin. Microbiol. 2014, 52(6):1871
132	SRR1105984	NGAS615	Canada	2010-2013		EMM82.0,	EMM82.0	E3	ST334	Athey J. Clin. Microbiol. 2014, 52(6):1871
133	SRR1105985	NGAS616	Canada	2010-2013		EMM22.0,EMM156.0	EMM22.0	E4	ST46~	Athey J. Clin. Microbiol. 2014, 52(6):1871
134	SRR1105986	NGAS618	Canada	2010-2013		EMM6.0,	EMM6.0	M6	ST382	Athey J. Clin. Microbiol. 2014, 52(6):1871
135	SRR1105987	NGAS620	Canada	2010-2013		EMM83.1,EMM240.1	EMM83.1	D4	ST5	Athey J. Clin. Microbiol. 2014, 52(6):1871
136	SRR1105988	NGAS623	Canada	2010-2013		EMM1.0,	EMM1.0	A-C3	ST28	Athey J. Clin. Microbiol. 2014, 52(6):1871
137	SRR1105989	NGAS625	Canada	2010-2013		EMM159.0,EMM114.0	EMM114.0	E4	ST188	Athey J. Clin. Microbiol. 2014, 52(6):1871
138	SRR1105990	NGAS628	Canada	2010-2013		EMM87.0,	EMM87.0	E3	ST62	Athey J. Clin. Microbiol. 2014, 52(6):1871
139	SRR1105991	NGAS629	Canada	2010-2013		EMM83.1,EMM240.1	EMM83.1	D4	ST5	Athey J. Clin. Microbiol. 2014, 52(6):1871
140	SRR1105992	NGAS630	Canada	2010-2013		EMM87.0,	EMM87.0	E3	ST62	Athey J. Clin. Microbiol. 2014, 52(6):1871
141	SRR1105993	NGAS633	Canada	2010-2013		EMM83.1,	EMM83.1	D4	ST853	Athey J. Clin. Microbiol. 2014, 52(6):1871
142	SRR1105994	NGAS634	Canada	2010-2013		EMM87.0,	EMM87.0	E3	ST62	Athey J. Clin. Microbiol. 2014, 52(6):1871
143	SRR1105995	NGAS638	Canada	2010-2013		EMM205.0,EMM101.0	EMM101.0	D4	ST182	Athey J. Clin. Microbiol. 2014, 52(6):1871
144	SRR1105996	NGAS639	Canada	2010-2013		EMM59.0,EMM174.1	EMM59.0	E6	ST172	Athey J. Clin. Microbiol. 2014, 52(6):1871
145	SRR1105997	NGAS640	Canada	2010-2013		EMM11.0,EMM202.1	EMM11.0	E6	ST22~	Athey J. Clin. Microbiol. 2014, 52(6):1871
146	SRR1105998	NGAS641	Canada	2010-2013		EMM159.0,EMM114.0	EMM114.0	E4	ST188	Athey J. Clin. Microbiol. 2014, 52(6):1871
147	SRR1106000	NGAS643	Canada	2010-2013		EMM83.1,	EMM83.1	D4	ST853	Athey J. Clin. Microbiol. 2014, 52(6):1871
148	SRR1106001	NGAS650	Canada	2010-2013		EMM3.60,	EMM3.6	A-C5	ST315	Athey J. Clin. Microbiol. 2014, 52(6):1871
149	SRR1106002	NGAS653	Canada	2010-2013		EMM28.0,	EMM28.0	E4	ST458	Athey J. Clin. Microbiol. 2014, 52(6):1871
150	SRR1106003	NGAS655	Canada	2010-2013		EMM83.1,	EMM83.1	D4	ST853	Athey J. Clin. Microbiol. 2014, 52(6):1871
151	SRR1106004	NGAS657	Canada	2010-2013		EMM1.0,	EMM1.0	A-C3	ST28	Athey J. Clin. Microbiol. 2014, 52(6):1871
152	SRR1106005	NGAS660	Canada	2010-2013		EMM89.0,EMM203.3	EMM89.0	E4	ST101	Athey J. Clin. Microbiol. 2014, 52(6):1871
153	SRR1106006	NGAS662	Canada	2010-2013		EMM87.0~,EMM159.0	EMM87.0	E3	ST62	Athey J. Clin. Microbiol. 2014, 52(6):1871
154	SRR1106007	NGAS663	Canada	2010-2013		EMM89.0,EMM203.3	EMM89.0	E4	ST101	Athey J. Clin. Microbiol. 2014, 52(6):1871
155	SRR1106008	NGAS664	Canada	2010-2013		EMM74.0,EMM156.0	EMM74.0	M74	ST120	Athey J. Clin. Microbiol. 2014, 52(6):1871
156	SRR1106009	NGAS665	Canada	2010-2013		EMM87.0~,EMM159.0	EMM87.0	E3	ST62	Athey J. Clin. Microbiol. 2014, 52(6):1871
157	SRR1106010	NGAS668	Canada	2010-2013		EMM87.0~,EMM159.0	EMM87.0	E3	ST62	Athey J. Clin. Microbiol. 2014, 52(6):1871
158	SRR1106011	NGAS669	Canada	2010-2013		EMM87.0~,EMM159.0	EMM87.0	E3	ST62	Athey J. Clin. Microbiol. 2014, 52(6):1871
159	SRR1106012	NGAS670	Canada	2010-2013		EMM4.0,EMM156.0,EMM236.0	EMM4.0	E1	ST39	Athey J. Clin. Microbiol. 2014, 52(6):1871
160	SRR1106013	NGAS671	Canada	2010-2013		EMM2.0,EMM149.2	EMM2.0	E4	ST55	Athey J. Clin. Microbiol. 2014, 52(6):1871
161	SRR1106015	NGAS673	Canada	2010-2013		EMM89.0,EMM203.3	EMM89.0	E4	ST101	Athey J. Clin. Microbiol. 2014, 52(6):1871
162	SRR1106016	NGAS675	Canada	2010-2013		EMM156.0,EMM236.0,EMM4.0	EMM4.0	E1	ST39	Athey J. Clin. Microbiol. 2014, 52(6):1871
163	SRR1106017	NGAS717	Canada	2010-2013		EMM92.0~,	EMM92	E2	ST82	Athey J. Clin. Microbiol. 2014, 52(6):1871
164	SRR1106018	NGAS719	Canada	2010-2013		EMM90.5,	EMM90.5	E2	ST144	Athey J. Clin. Microbiol. 2014, 52(6):1871
165	SRR1106019	NGAS726	Canada	2010-2013		EMM68.3,EMM159.0	EMM68.3	E2	ST86~	Athey J. Clin. Microbiol. 2014, 52(6):1871
166	SRR1106020	NGAS729	Canada	2010-2013		EMM94.0,	EMM94.0	E6	ST89	Athey J. Clin. Microbiol. 2014, 52(6):1871
167	SRR1106021	NGAS732	Canada	2010-2013		EMM94.0,	EMM94.0	E6	ST89	Athey J. Clin. Microbiol. 2014, 52(6):1871
168	SRR1106022	NGAS737	Canada	2010-2013		EMM156.0,EMM4.0	EMM4		ST39	Athey J. Clin. Microbiol. 2014, 52(6):1871
169	SRR1106023	NGAS739	Canada	2010-2013		EMM87.0,	EMM87.0	E3	ST62	Athey J. Clin. Microbiol. 2014, 52(6):1871
170	SRR1106024	NGAS743	Canada	2010-2013		EMM87.0,	EMM87.0	E3	ST62	Athey J. Clin. Microbiol. 2014, 52(6):1871
171	SRR1106025	NGAS746	Canada	2010-2013		EMM4.0,EMM156.0	EMM4.0	E1	ST39	Athey J. Clin. Microbiol. 2014, 52(6):1871
172	SRR1106026	NGAS747	Canada	2010-2013		EMM87.0,	EMM87.0	E3	ST62	Athey J. Clin. Microbiol. 2014, 52(6):1871
173	SRR1106027	NGAS749	Canada	2010-2013		EMM12.0,	EMM12.0	A-C4	ST36	Athey J. Clin. Microbiol. 2014, 52(6):1871
174	SRR1106028	NGAS750	Canada	2010-2013		EMM1.0,	EMM1.0	A-C3	ST28	Athey J. Clin. Microbiol. 2014, 52(6):1871
175	SRR1106029	NGAS751	Canada	2010-2013		EMM115.0,	EMM115.0	D2	ST135	Athey J. Clin. Microbiol. 2014, 52(6):1871
176	SRR1106030	NGAS755	Canada	2010-2013		EMM101.0,EMM205.0	EMM101.0	D4	ST182	Athey J. Clin. Microbiol. 2014, 52(6):1871
177	SRR1106031	NGAS757	Canada	2010-2013		EMM82.0,	EMM82.0	E3	ST334	Athey J. Clin. Microbiol. 2014, 52(6):1871
178	SRR1106032	NGAS758	Canada	2010-2013		EMM4.0,EMM156.0	EMM4.0	E1	ST39	Athey J. Clin. Microbiol. 2014, 52(6):1871
179	SRR1106033	NGAS759	Canada	2010-2013		EMM156.0,EMM4.0	EMM4.0	E1	ST39	Athey J. Clin. Microbiol. 2014, 52(6):1871
180	SRR1106034	NGAS760	Canada	2010-2013		EMM4.0,EMM156.0,EMM236.0	EMM4.0	E1	ST39	Athey J. Clin. Microbiol. 2014, 52(6):1871
181	7622_7#50	33022V1T1	Fiji	2006	Throat	EMM82.1,	EMM82.1	E3	ST320	Lees J Nat. Commun. 7:12797
182	7622_7#52	33042V1T1	Fiji	2006	Throat	EMM14.4,EMM134.1	EMM14.4	M14	ST118	Lees J Nat. Commun. 7:12797
183	7622_7#61	33076V1T1	Fiji	2006	Throat	EMM232.1,EMM159.0	EMM232.1	E4	ST288~	Lees J Nat. Commun. 7:12797
184	7622_7#64	33087V1T1	Fiji	2006	Throat	EMM58.0~,EMM236.1	EMM58.0	E3	ST176	Lees J Nat. Commun. 7:12797
185	7622_7#67	33100V1T1	Fiji	2006	Throat	EMM166.2,EMM54.1	EMM54.1	D1	ST11~	Lees J Nat. Commun. 7:12797
186	7622_7#68	33101V1T1	Fiji	2006	Throat	EMM33.0,EMM174.0	EMM33.0	D4	ST3~	Lees J Nat. Commun. 7:12797
187	7622_7#71	33112V1T1	Fiji	2006	Throat	EMM42.0,	EMM42.0	E6	ST80~	Lees J Nat. Commun. 7:12797
188	7622_7#72	33124V1T1	Fiji	2006	Throat	EMM65.4,	EMM65.4	E6	ST129	Lees J Nat. Commun. 7:12797
189	7622_7#73	33129V1T1	Fiji	2006	Throat	EMM75.1,EMM170.0	EMM75.1	E6	ST468~	Lees J Nat. Commun. 7:12797
190	7622_7#74	33131V1T1	Fiji	2006	Throat	EMM232.1,EMM159.0	EMM232.1	E4	ST288~	Lees J Nat. Commun. 7:12797
191	7622_7#75	33133V1T1	Fiji	2006	Throat	EMM71.0,	EMM71.0	D2	ST318	Lees J Nat. Commun. 7:12797
192	7622_7#77	33140V1T1	Fiji	2006	Throat	EMM86.2,EMM240.2	EMM86.2	D4	ST14~	Lees J Nat. Commun. 7:12797
193	7622_7#80	33149V1T1	Fiji	2006	Throat	EMM77.0,EMM149.2	EMM77.0	E4	ST572	Lees J Nat. Commun. 7:12797
194	7622_7#85	33167V1T1	Fiji	2006	Throat	EMM230.0,	EMM230.0	D4	ST10	Lees J Nat. Commun. 7:12797
195	7622_7#87	33173V1T1	Fiji	2006	Throat	EMM71.0,	EMM71.0	D2	ST318	Lees J Nat. Commun. 7:12797
196	7622_7#89	33181V1T1	Fiji	2006	Throat	EMM137.0,	EMM137.0	E5	ST268	Lees J Nat. Commun. 7:12797
197	7622_7#90	33185V1T1	Fiji	2006	Throat	EMM74.0,EMM156.0	EMM74.0	M74	ST120	Lees J Nat. Commun. 7:12797
198	7622_7#91	33193V1T1	Fiji	2006	Throat	EMM25.1,EMM159.0	EMM25.1	E3	ST192	Lees J Nat. Commun. 7:12797
199	7622_7#92	33202V1T1	Fiji	2006	Throat	EMM174.0,EMM33.0	EMM33.0	D4	ST3	Lees J Nat. Commun. 7:12797
200	8113_6#1	20004V1S1	Fiji	2006		EMM105.0,	EMM105.0	M105	ST72~	Lees J Nat. Commun. 7:12797
201	8113_6#10	20028V1I1	Fiji	2006	Invasive	EMM81.3,	EMM81.3	E6	ST183~	Lees J Nat. Commun. 7:12797
202	8113_6#11	20033V1I1	Fiji	2006	Invasive	EMM81.3,	EMM81.3	E6	ST183~	Lees J Nat. Commun. 7:12797
203	8113_6#12	20034V1I1	Fiji	2006	Invasive	EMM76.4,EMM236.2	EMM76.4	E2	ST353	Lees J Nat. Commun. 7:12797
204	8113_6#13	20051V1I1	Fiji	2006	Invasive	EMM236.2,EMM76.4	EMM76.4	E2	ST353	Lees J Nat. Commun. 7:12797
205	8113_6#14	20057V1I1	Fiji	2006	Invasive	EMM105.0,	EMM105.0	M105	ST72~	Lees J Nat. Commun. 7:12797
206	8113_6#15	20058V1I1	Fiji	2006	Invasive	EMM18.22,	EMM18.22	M18	ST535	Lees J Nat. Commun. 7:12797
207	8113_6#16	20059V1I1	Fiji	2006	Invasive	EMM58.0,EMM236.1	EMM58.0	E3	ST176	Lees J Nat. Commun. 7:12797
208	8113_6#17	20061V1I1	Fiji	2006	Invasive	EMM236.2,EMM76.4	EMM76.4	E2	ST353	Lees J Nat. Commun. 7:12797
209	8113_6#18	20064V1I1	Fiji	2006	Invasive	EMM57.0,EMM166.1	EMM57.0	M57	ST348~	Lees J Nat. Commun. 7:12797
210	8113_6#19	20065V1I1	Fiji	2006	Invasive	EMM113.0,	EMM113.0	E3	ST148	Lees J Nat. Commun. 7:12797
211	8113_6#2	20006V1I1	Fiji	2006	Invasive	EMM11.0,EMM202.1	EMM11.0	E6	ST547~	Lees J Nat. Commun. 7:12797
212	8113_6#20	20066V1I1	Fiji	2006	Invasive	EMM33.0,EMM174.0	EMM33.0	D4	ST3	Lees J Nat. Commun. 7:12797
213	8113_6#21	20068V1I1	Fiji	2006	Invasive	EMM123.0,EMM205.0	EMM123.0	D3	ST325	Lees J Nat. Commun. 7:12797
214	8113_6#22	20071V1I1	Fiji	2006	Invasive	EMM73.0,	EMM73.0	E4	ST739~	Lees J Nat. Commun. 7:12797
215	8113_6#23	20077V1I1	Fiji	2006	Invasive	EMM60.7,	EMM60.7	E1	ST193	Lees J Nat. Commun. 7:12797
216	8113_6#24	20079V1I1	Fiji	2006	Invasive	EMM104.0,EMM149.0	EMM104.0	E2	ST789	Lees J Nat. Commun. 7:12797
217	8113_6#25	20081V1I1	Fiji	2006	Invasive	EMM134.2,EMM53.0	EMM53.0	D4	ST11	Lees J Nat. Commun. 7:12797
218	8113_6#26	20085V1I1	Fiji	2006	Invasive	EMM11.0,EMM202.1	EMM11.0	E6	ST547~	Lees J Nat. Commun. 7:12797
219	8113_6#27	20086V1I1	Fiji	2006	Invasive	EMM33.0,EMM174.0	EMM33.0	D4	ST3	Lees J Nat. Commun. 7:12797
220	8113_6#29	20095V1I1	Fiji	2006		EMM73.0,	EMM73.0	E4	ST739~	Lees J Nat. Commun. 7:12797
221	8113_6#3	20011V1S1	Fiji	2006		EMM68.0,	EMM68.0	E2	ST327~	Lees J Nat. Commun. 7:12797
222	8113_6#30	20097V1I1	Fiji	2006	Invasive	EMM106.0,	EMM106.0	E2	ST140	Lees J Nat. Commun. 7:12797
223	8113_6#31	20098V1I1	Fiji	2006	Invasive	EMM106.0,	EMM106.0	E2	ST140	Lees J Nat. Commun. 7:12797
224	8113_6#32	20099V1I1	Fiji	2006	Invasive	EMM52.1,EMM134.2	EMM52.1	D4	ST180	Lees J Nat. Commun. 7:12797
225	8113_6#33	20109V1I1	Fiji	2006	Invasive	EMM167.0,EMM100.0	EMM100.0	D2	ST119	Lees J Nat. Commun. 7:12797
226	8113_6#34	20110V1I1	Fiji	2006	Invasive	EMM236.2,EMM76.4	EMM76.4	E2	ST353	Lees J Nat. Commun. 7:12797
227	8113_6#35	20111V1I1	Fiji	2006	Invasive	EMM15.1,	EMM15.1	E3	ST121~	Lees J Nat. Commun. 7:12797
228	8113_6#36	20113V1I1	Fiji	2006	Invasive	EMM167.0,EMM100.0	EMM100.0	D2	ST119	Lees J Nat. Commun. 7:12797
229	8113_6#37	20116V1I1	Fiji	2006	Invasive	EMM167.0,EMM100.0	EMM100.0	D2	ST119	Lees J Nat. Commun. 7:12797
230	8113_6#38	20123V1I1	Fiji	2006	Invasive	EMM100.0,EMM167.0	EMM100.0	D2	ST119	Lees J Nat. Commun. 7:12797
231	8113_6#4	20008V1I1	Fiji	2006	Invasive	EMM33.0,EMM174.0	EMM33.0	D4	ST3	Lees J Nat. Commun. 7:12797
232	8113_6#40	20139V1I1	Fiji	2006	Invasive	EMM77.0,EMM149.2	EMM77.0	E4	ST35~	Lees J Nat. Commun. 7:12797
233	8113_6#41	20148V1I1	Fiji	2006	Invasive	EMM106.0,	EMM106.0	E2	ST140	Lees J Nat. Commun. 7:12797
234	8113_6#42	20170V1I1	Fiji	2006	Invasive	EMM22.0,EMM170.1	EMM22.0	E4	ST202	Lees J Nat. Commun. 7:12797
235	8113_6#43	20174V1I1	Fiji	2006	Invasive	EMM82.1,	EMM82.1	E3	ST320	Lees J Nat. Commun. 7:12797
236	8113_6#44	20178V1I1	Fiji	2006	Invasive	EMM202.1,EMM11.0	EMM11.0	E6	ST547~	Lees J Nat. Commun. 7:12797
237	8113_6#45	20183V1I1	Fiji	2006	Invasive	EMM57.0,EMM166.1	EMM57.0	M57	ST348~	Lees J Nat. Commun. 7:12797
238	8113_6#46	20184V1I1	Fiji	2006	Invasive	EMM75.1,EMM170.0	EMM75.1	E6	ST468	Lees J Nat. Commun. 7:12797
239	8113_6#47	20232V1I1	Fiji	2006	Invasive	EMM205.0,EMM101.0	EMM101.0	D4	ST182	Lees J Nat. Commun. 7:12797
240	8113_6#48	20237V1I1	Fiji	2006	Invasive	EMM63.3,	EMM63.3	E6	ST297	Lees J Nat. Commun. 7:12797
241	8113_6#49	20242V1I1	Fiji	2006	Invasive	EMM19.4,EMM134.1	EMM19.4	M19	ST616	Lees J Nat. Commun. 7:12797
242	8113_6#5	20012V1I1	Fiji	2006	Invasive	EMM65.4,	EMM65.4	E6	ST129	Lees J Nat. Commun. 7:12797
243	8113_6#51	30083V1T1	Fiji	2006	Throat	EMM86.2,EMM240.2	EMM86.2	D4	ST14~	Lees J Nat. Commun. 7:12797
244	8113_6#52	30085V1T1	Fiji	2006	Throat	EMM232.1,EMM159.0	EMM232.1	E4	ST288~	Lees J Nat. Commun. 7:12797
245	8113_6#53	30108V1T1	Fiji	2006	Throat	EMM202.1,EMM11.0	EMM11.0	E6	ST547~	Lees J Nat. Commun. 7:12797
246	8113_6#54	30109V1T1	Fiji	2006	Throat	EMM92.0,	EMM92.0	E2	ST599~	Lees J Nat. Commun. 7:12797
247	8113_6#55	30124V1T1	Fiji	2006	Throat	EMM92.0,	EMM92.0	E2	ST599~	Lees J Nat. Commun. 7:12797
248	8113_6#56	30164V1T1	Fiji	2006	Throat	EMM105.0,	EMM105.0	M105	ST72~	Lees J Nat. Commun. 7:12797
249	8113_6#58	30178V1T1	Fiji	2006	Throat	EMM205.0,EMM123.0	EMM123.0	D3	ST325	Lees J Nat. Commun. 7:12797
250	8113_6#59	30227V1T1	Fiji	2006	Throat	EMM232.1,EMM159.0	EMM232.1	E4	ST288~	Lees J Nat. Commun. 7:12797
251	8113_6#6	20018V1I1	Fiji	2006	Invasive	EMM87.0,	EMM87.0	E3	ST541	Lees J Nat. Commun. 7:12797
252	8113_6#60	30237V1T1	Fiji	2006	Throat	EMM86.2,EMM240.2	EMM86.2	D4	ST14~	Lees J Nat. Commun. 7:12797
253	8113_6#61	30239V1T1	Fiji	2006	Throat	EMM226.0,EMM238.2	EMM238.2	A-C3	ST867	Lees J Nat. Commun. 7:12797
254	8113_6#62	31002V1T1	Fiji	2006	Throat	EMM56.0,EMM205.0	EMM56.0	D4	ST115	Lees J Nat. Commun. 7:12797
255	8113_6#63	31138V1T1	Fiji	2006	Throat	EMM4.5,	EMM4.5	E1	ST289~	Lees J Nat. Commun. 7:12797
256	8113_6#64	31150V1T1	Fiji	2006	Throat	EMM56.0,EMM205.0	EMM56.0	D4	ST115	Lees J Nat. Commun. 7:12797
257	8113_6#65	31168V1T1	Fiji	2006	Throat	EMM205.0,EMM101.0	EMM101.0	D4	ST182	Lees J Nat. Commun. 7:12797
258	8113_6#7	20019V1I1	Fiji	2006	Invasive	EMM60.7,	EMM60.7	E1	ST193	Lees J Nat. Commun. 7:12797
259	8113_6#8	20025V1I1	Fiji	2006	Invasive	EMM86.2,EMM240.2	EMM86.2	D4	ST14~	Lees J Nat. Commun. 7:12797
260	8113_6#84	31001V5S1	Fiji	2006	Skin	EMM11.0,EMM202.1	EMM11.0	E6	ST547~	Lees J Nat. Commun. 7:12797
261	8113_6#85	31002V5S1	Fiji	2006	Skin	EMM11.0,EMM202.1	EMM11.0	E6	ST547~	Lees J Nat. Commun. 7:12797
262	8113_6#87	31004V6S1	Fiji	2006	Skin	EMM49.0,EMM236.2	EMM49.0	E3	ST433	Lees J Nat. Commun. 7:12797
263	8113_6#88	31005V6S1	Fiji	2006	Skin	EMM137.0,EMM39.4	EMM39.4	A-C4	ST268	Lees J Nat. Commun. 7:12797
264	8113_6#89	31006V5S1	Fiji	2006	Skin	EMM103.0,	EMM103.0	E3	ST327	Lees J Nat. Commun. 7:12797
265	8113_6#9	20027V1I1	Fiji	2006	Invasive	EMM110.0,EMM203.3	EMM110.0	E2	ST515	Lees J Nat. Commun. 7:12797
266	8113_6#90	31009V5S1	Fiji	2006	Skin	EMM49.0,EMM236.2	EMM49.0	E3	ST433	Lees J Nat. Commun. 7:12797
267	8113_6#91	31022V5S1	Fiji	2006	Skin	EMM11.0,EMM202.1	EMM11.0	E6	ST547~	Lees J Nat. Commun. 7:12797
268	8113_6#92	31038V6S1	Fiji	2006	Skin	EMM103.0,	EMM103.0	E3	ST327	Lees J Nat. Commun. 7:12797
269	8113_6#93	31039V5S1	Fiji	2006	Skin	EMM49.0,EMM236.2	EMM49.0	E3	ST433	Lees J Nat. Commun. 7:12797
270	8113_6#94	31039V6S1	Fiji	2006	Skin	EMM174.1,EMM156.0,EMM93.4	EMM93.4	D4	ST814	Lees J Nat. Commun. 7:12797
271	8113_6#95	31042V5S1	Fiji	2006	Skin	EMM56.0,EMM205.0	EMM56.0	D4	ST115	Lees J Nat. Commun. 7:12797
272	8113_6#96	31043V6S1	Fiji	2006	Skin	EMM56.0,EMM205.0	EMM56.0	D4	ST115	Lees J Nat. Commun. 7:12797
273	8113_7#1	31046V5S1	Fiji	2006	Skin	EMM82.1,	EMM82.1	E3	ST320	Lees J Nat. Commun. 7:12797
274	8113_7#10	31072V6S2	Fiji	2006	Skin	EMM33.0,EMM174.0	EMM33.0	D4	ST3	Lees J Nat. Commun. 7:12797
275	8113_7#11	31073V5S1	Fiji	2006	Skin	EMM236.2,EMM76.4	EMM76.4	E2	ST353	Lees J Nat. Commun. 7:12797
276	8113_7#12	31075V5S1	Fiji	2006	Skin	EMM56.0,EMM205.0	EMM56.0	D4	ST115	Lees J Nat. Commun. 7:12797
277	8113_7#13	31086V5S1	Fiji	2006	Skin	EMM65.4,	EMM65.4	E6	ST129	Lees J Nat. Commun. 7:12797
278	8113_7#14	31090V5S1	Fiji	2006	Skin	EMM11.0,EMM202.1	EMM11.0	E6	ST547~	Lees J Nat. Commun. 7:12797
279	8113_7#15	31097V5S1	Fiji	2006	Skin	EMM56.0,EMM205.0	EMM56.0	D4	ST115	Lees J Nat. Commun. 7:12797
280	8113_7#16	31107V5S1	Fiji	2006	Skin	EMM65.4,	EMM65.4	E6	ST129	Lees J Nat. Commun. 7:12797
281	8113_7#17	31108V5S1	Fiji	2006	Skin	EMM174.1,EMM93.4,EMM156.0	EMM93.4	D4	ST814	Lees J Nat. Commun. 7:12797
282	8113_7#18	31113V5S1	Fiji	2006	Skin	EMM74.0,EMM156.0	EMM74.0	M74	ST120	Lees J Nat. Commun. 7:12797
283	8113_7#19	31114V5S1	Fiji	2006	Skin	EMM39.4,EMM137.0	EMM39.4	A-C4	ST268	Lees J Nat. Commun. 7:12797
284	8113_7#2	31049V5S1	Fiji	2006	Skin	EMM65.4,	EMM65.4	E6	ST129	Lees J Nat. Commun. 7:12797
285	8113_7#20	31114V6S1	Fiji	2006	Skin	EMM103.0,	EMM103.0	E3	ST327	Lees J Nat. Commun. 7:12797
286	8113_7#21	31126V5S1	Fiji	2006	Skin	EMM65.4,	EMM65.4	E6	ST129	Lees J Nat. Commun. 7:12797
287	8113_7#22	31128V6S1	Fiji	2006	Skin	EMM70.0,EMM174.1	EMM70.0	D4	ST10	Lees J Nat. Commun. 7:12797
288	8113_7#24	31134V5S1	Fiji	2006	Skin	EMM202.1,EMM11.0	EMM11.0	E6	ST547~	Lees J Nat. Commun. 7:12797
289	8113_7#25	31136V5S1	Fiji	2006	Skin	EMM56.0,EMM205.0	EMM56.0	D4	ST115	Lees J Nat. Commun. 7:12797
290	8113_7#26	31136V6S1	Fiji	2006	Skin	EMM137.0,EMM39.4	EMM39.4	A-C4	ST268	Lees J Nat. Commun. 7:12797
291	8113_7#27	31138V6S1	Fiji	2006	Skin	EMM137.0,EMM39.4	EMM39.4	A-C4	ST268	Lees J Nat. Commun. 7:12797
292	8113_7#28	31142V6S1	Fiji	2006	Skin	EMM93.4,EMM174.1,EMM156.0	EMM93.4	D4	ST814	Lees J Nat. Commun. 7:12797
293	8113_7#29	31144V6S1	Fiji	2006	Skin	EMM105.0,	EMM105.0	M105	ST72~	Lees J Nat. Commun. 7:12797
294	8113_7#3	31049V5S2	Fiji	2006	Skin	EMM70.0,EMM174.1	EMM70.0	D4	ST10	Lees J Nat. Commun. 7:12797
295	8113_7#30	31145V5S1	Fiji	2006	Skin	EMM174.1,EMM156.0,EMM93.4	EMM93.4	D4	ST814	Lees J Nat. Commun. 7:12797
296	8113_7#31	31154V5S1	Fiji	2006	Skin	EMM4.5,	EMM4.5	E1	ST289~	Lees J Nat. Commun. 7:12797
297	8113_7#32	31155V6S1	Fiji	2006	Skin	EMM56.0,EMM205.0	EMM56.0	D4	ST115	Lees J Nat. Commun. 7:12797
298	8113_7#33	31158V5S1	Fiji	2006	Skin	EMM49.0,EMM236.2	EMM49.0	E3	ST433	Lees J Nat. Commun. 7:12797
299	8113_7#34	31163V5S1	Fiji	2006	Skin	EMM70.0,EMM174.1	EMM70.0	D4	ST10	Lees J Nat. Commun. 7:12797
300	8113_7#35	31165V6S1	Fiji	2006	Skin	EMM39.4,EMM137.0	EMM39.4	A-C4	ST268	Lees J Nat. Commun. 7:12797
301	8113_7#36	31168V5S1	Fiji	2006	Skin	EMM137.0,EMM39.4	EMM39.4	A-C4	ST268	Lees J Nat. Commun. 7:12797
302	8113_7#37	31170V5S1	Fiji	2006	Skin	EMM174.1,EMM156.0,EMM93.4	EMM93.4	D4	ST814	Lees J Nat. Commun. 7:12797
303	8113_7#38	41095V1S1	Fiji	2006	Skin	EMM63.3,	EMM63.3	E6	ST297	Lees J Nat. Commun. 7:12797
304	8113_7#39	41126V1S1	Fiji	2006	Skin	EMM11.0,EMM202.1	EMM11.0	E6	ST547~	Lees J Nat. Commun. 7:12797
305	8113_7#4	31050V6S1	Fiji	2006	Skin	EMM73.0,	EMM73.0	E4	ST739~	Lees J Nat. Commun. 7:12797
306	8113_7#40	42003V1S1	Fiji	2006	Skin	EMM71.0,	EMM71.0	D2	ST318	Lees J Nat. Commun. 7:12797
307	8113_7#41	42023V1S1	Fiji	2006	Skin	EMM55.0,	EMM55.0	M55	ST100	Lees J Nat. Commun. 7:12797
308	8113_7#42	42024V1S1	Fiji	2006	Skin	EMM11.0,EMM202.1	EMM11.0	E6	ST547~	Lees J Nat. Commun. 7:12797
309	8113_7#44	42028V1S1	Fiji	2006	Skin	EMM167.0,EMM100.0	EMM100.0	D2	ST119	Lees J Nat. Commun. 7:12797
310	8113_7#45	42043V1S1	Fiji	2006	Skin	EMM74.0,EMM156.0	EMM74.0	M74	ST120	Lees J Nat. Commun. 7:12797
311	8113_7#46	42048V1S1	Fiji	2006	Skin	EMM81.3,	EMM81.3	E6	ST183~	Lees J Nat. Commun. 7:12797
312	8113_7#47	42056V1S1a	Fiji	2006	Skin	EMM159.0,EMM25.0	EMM25.0	E3	ST191	Lees J Nat. Commun. 7:12797
313	8113_7#49	42058V1S1	Fiji	2006	Skin	EMM75.1,EMM170.0	EMM74.1	M74	ST468	Lees J Nat. Commun. 7:12797
314	8113_7#5	31056V5S1	Fiji	2006	Skin	EMM202.1,EMM11.0	EMM11.0	E6	ST547~	Lees J Nat. Commun. 7:12797
315	8113_7#50	42063V1S1	Fiji	2006	Skin	EMM97.1,	EMM97.1	D5	ST216	Lees J Nat. Commun. 7:12797
316	8113_7#51	42070V1S1	Fiji	2006	Skin	EMM44.0,	EMM44.0	E3	ST178	Lees J Nat. Commun. 7:12797
317	8113_7#53	43078V1S1	Fiji	2006	Skin	EMM122.2~,EMM156.0	EMM122.X	M122	ST412~	Lees J Nat. Commun. 7:12797
318	8113_7#54	43086V1S1	Fiji	2006	Skin	EMM202.1,EMM11.0	EMM11.0	E6	ST547~	Lees J Nat. Commun. 7:12797
319	8113_7#55	43110V1S1	Fiji	2006	Skin	EMM57.0,EMM166.1	EMM57.0	M57	ST348~	Lees J Nat. Commun. 7:12797
320	8113_7#56	44001V1S1	Fiji	2006	Skin	EMM123.0,EMM205.0	EMM123.0	D3	ST325	Lees J Nat. Commun. 7:12797
321	8113_7#57	44002V1S1	Fiji	2006	Skin	EMM103.0,	EMM103.0	E3	ST327	Lees J Nat. Commun. 7:12797
322	8113_7#58	44004V1S1	Fiji	2006	Skin	EMM82.1,	EMM82.1	E3	ST591	Lees J Nat. Commun. 7:12797
323	8113_7#59	44015V1S1	Fiji	2006	Skin	EMM81.3,	EMM81.3	E6	ST183~	Lees J Nat. Commun. 7:12797
324	8113_7#6	31056V6S1	Fiji	2006	Skin	EMM11.0,EMM202.1	EMM11.0	E6	ST547~	Lees J Nat. Commun. 7:12797
325	8113_7#60	44031V1S1	Fiji	2006	Skin	EMM82.1,	EMM82.1	E3	ST320	Lees J Nat. Commun. 7:12797
326	8113_7#61	44037V1S1	Fiji	2006	Skin	EMM116.1,	EMM116.1	D4	ST227	Lees J Nat. Commun. 7:12797
327	8113_7#62	44052V1S1	Fiji	2006	Skin	EMM44.0,	EMM44.0	E3	ST178	Lees J Nat. Commun. 7:12797
328	8113_7#63	44079V1S1	Fiji	2006	Skin	EMM87.0,	EMM87.0	E3	ST541	Lees J Nat. Commun. 7:12797
329	8113_7#66	31004V2S1	Fiji	2006	Skin	EMM70.0,EMM174.1	EMM70.0	D4	ST10	Lees J Nat. Commun. 7:12797
330	8113_7#67	31006V2S1	Fiji	2006	Skin	EMM70.0,EMM174.1	EMM70.0	D4	ST10	Lees J Nat. Commun. 7:12797
331	8113_7#68	31012V2S1	Fiji	2006	Skin	EMM93.4,EMM174.1,EMM156.0	EMM73.4	E4	ST814	Lees J Nat. Commun. 7:12797
332	8113_7#7	31059V6S1	Fiji	2006	Skin	EMM134.2,EMM53.0	EMM53.0	D4	ST11	Lees J Nat. Commun. 7:12797
333	8113_7#70	31026V2S1	Fiji	2006		EMM105.0,	EMM105.0	M105	ST72~	Lees J Nat. Commun. 7:12797
334	8113_7#71	31027V2S1	Fiji	2006	Skin	EMM52.1,EMM134.2	EMM52.1	D4	ST180	Lees J Nat. Commun. 7:12797
335	8113_7#72	31028V2S1	Fiji	2006	Skin	EMM73.0,	EMM73.0	E4	ST739~	Lees J Nat. Commun. 7:12797
336	8113_7#74	31041V2S1	Fiji	2006	Skin	EMM70.0,EMM174.1	EMM70.0	D4	ST10	Lees J Nat. Commun. 7:12797
337	8113_7#75	31056V2S1	Fiji	2006	Skin	EMM65.4,	EMM65.4	E6	ST129	Lees J Nat. Commun. 7:12797
338	8113_7#77	31067V2S1	Fiji	2006	Skin	EMM174.0,EMM33.0	EMM33.0	D4	ST3	Lees J Nat. Commun. 7:12797
339	8113_7#78	31069V2S1	Fiji	2006	Skin	EMM82.1,	EMM82.1	E3	ST320	Lees J Nat. Commun. 7:12797
340	8113_7#79	31076V2S1	Fiji	2006	Skin	EMM56.0,EMM205.0	EMM56.0	D4	ST115	Lees J Nat. Commun. 7:12797
341	8113_7#8	31062V6S1	Fiji	2006	Skin	EMM103.0,	EMM103.0	E3	ST327	Lees J Nat. Commun. 7:12797
342	8113_7#80	31082V2S1	Fiji	2006	Skin	EMM11.0,EMM202.1	EMM11.0	E6	ST547~	Lees J Nat. Commun. 7:12797
343	8113_7#81	31084V2S1	Fiji	2006	Skin	EMM70.0,EMM174.1	EMM70.0	D4	ST10	Lees J Nat. Commun. 7:12797
344	8113_7#9	31072V6S1	Fiji	2006	Skin	EMM202.1,EMM11.0	EMM11.0	E6	ST547~	Lees J Nat. Commun. 7:12797
345	9262_5#1	31011V3T1	Fiji	2006	Throat	EMM65.4,	EMM65.4	E6	ST129	Lees J Nat. Commun. 7:12797
346	9262_5#10	31034V1S1	Fiji	2006		EMM105.0,	EMM105.0	M105	ST72~	Lees J Nat. Commun. 7:12797
347	9262_5#11	31036V1S1	Fiji	2006	Skin	EMM159.0,EMM25.0	EMM25.0	E3	ST191~	Lees J Nat. Commun. 7:12797
348	9262_5#12	31039V1S1	Fiji	2006	Skin	EMM25.0,EMM159.0	EMM25.0	E3	ST191~	Lees J Nat. Commun. 7:12797
349	9262_5#13	31043V1S1	Fiji	2006	Skin	EMM70.0,EMM174.1	EMM70.0	D4	ST10	Lees J Nat. Commun. 7:12797
350	9262_5#15	31063V1S1	Fiji	2006	Skin	EMM73.0,	EMM73.0	E4	ST739~	Lees J Nat. Commun. 7:12797
351	9262_5#16	31065V1S1	Fiji	2006	Skin	EMM56.0,EMM205.0	EMM56.0	D4	ST115	Lees J Nat. Commun. 7:12797
352	9262_5#17	31068V1S1	Fiji	2006	Skin	EMM73.0,	EMM73.0	E4	ST739~	Lees J Nat. Commun. 7:12797
353	9262_5#18	31078V1S1	Fiji	2006	Skin	EMM25.1,EMM159.0	EMM25.1	E3	ST192	Lees J Nat. Commun. 7:12797
354	9262_5#19	31080V1S1	Fiji	2006	Skin	EMM25.1,EMM159.0	EMM25.1	E3	ST192	Lees J Nat. Commun. 7:12797
355	9262_5#2	31013V2T1	Fiji	2006	Throat	EMM39.4,EMM137.0	EMM39.4	A-C4	ST268	Lees J Nat. Commun. 7:12797
356	9262_5#20	31081V1S1	Fiji	2006	Skin	EMM73.0,	EMM73.0	E4	ST739~	Lees J Nat. Commun. 7:12797
357	9262_5#21	31082V1S1	Fiji	2006	Skin	EMM73.0,	EMM73.0	E4	ST739~	Lees J Nat. Commun. 7:12797
358	9262_5#22	31086V1S1	Fiji	2006	Skin	EMM73.0,	EMM73.0	E4	ST739~	Lees J Nat. Commun. 7:12797
359	9262_5#24	31106V1S1	Fiji	2006	Skin	EMM25.0,EMM159.0	EMM25.0	E3	ST191~	Lees J Nat. Commun. 7:12797
360	9262_5#25	31111V1S1	Fiji	2006	Skin	EMM93.4,EMM174.1,EMM156.0	EMM93.4	D4	ST814	Lees J Nat. Commun. 7:12797
361	9262_5#26	31114V1S1	Fiji	2006	Skin	EMM25.0,EMM159.0	EMM25.0	E3	ST191~	Lees J Nat. Commun. 7:12797
362	9262_5#28	31122V1S1	Fiji	2006	Skin	EMM166.1,EMM207.1	EMM207.1	D1	ST332	Lees J Nat. Commun. 7:12797
363	9262_5#29	31129V1S2	Fiji	2006	Skin	EMM73.0,	EMM73.0	E4	ST739~	Lees J Nat. Commun. 7:12797
364	9262_5#3	31023V2T1	Fiji	2006	Throat	EMM56.0,EMM205.0	EMM56.0	D4	ST115	Lees J Nat. Commun. 7:12797
365	9262_5#30	31132V1S1	Fiji	2006	Skin	EMM25.0,EMM159.0	EMM25.0	E3	ST191~	Lees J Nat. Commun. 7:12797
366	9262_5#31	31140V1S1	Fiji	2006	Skin	EMM98.1,	EMM98.1	D4	ST205	Lees J Nat. Commun. 7:12797
367	9262_5#32	31143V1S1	Fiji	2006	Skin	EMM71.0,	EMM71.0	D2	ST318	Lees J Nat. Commun. 7:12797
368	9262_5#33	31147V1S1	Fiji	2006	Skin	EMM159.0,EMM25.0	EMM25.0	E3	ST191~	Lees J Nat. Commun. 7:12797
369	9262_5#34	31150V1S1	Fiji	2006	Skin	EMM56.0,EMM205.0	EMM56.0	D4	ST115	Lees J Nat. Commun. 7:12797
370	9262_5#35	31158V1S1	Fiji	2006	Skin	EMM159.0,EMM25.0	EMM25.0	E3	ST191~	Lees J Nat. Commun. 7:12797
371	9262_5#36	31165V1S1	Fiji	2006	Skin	EMM25.0,EMM159.0	EMM25.0	E3	ST191~	Lees J Nat. Commun. 7:12797
372	9262_5#37	31167V1S1	Fiji	2006	Skin	EMM56.0,EMM205.0	EMM56.0	D4	ST115	Lees J Nat. Commun. 7:12797
373	9262_5#39	31175V1S1	Fiji	2006	Skin	EMM25.0,EMM159.0	EMM25.0	E3	ST191~	Lees J Nat. Commun. 7:12797
374	9262_5#4	31039V5T1	Fiji	2006	Throat	EMM74.0,EMM156.0	EMM74.0	M74	ST120	Lees J Nat. Commun. 7:12797
375	9262_5#40	31176V1S1	Fiji	2006	Skin	EMM89.14,EMM236.2	EMM89.14	E4	ST380	Lees J Nat. Commun. 7:12797
376	9262_5#41	33014V1S1	Fiji	2006	Skin	EMM105.0,	EMM105.0	M105	ST72~	Lees J Nat. Commun. 7:12797
377	9262_5#42	33017V1S1	Fiji	2006	Skin	EMM92.0,	EMM92.0	E2	ST599~	Lees J Nat. Commun. 7:12797
378	9262_5#43	33022V1S1	Fiji	2006	Skin	EMM82.1,	EMM82.1	E3	ST320	Lees J Nat. Commun. 7:12797
379	9262_5#45	33041V1S1	Fiji	2006	Skin	EMM174.0,EMM33.0	EMM33.0	D4	ST3	Lees J Nat. Commun. 7:12797
380	9262_5#46	33048V1S1	Fiji	2006	Skin	EMM159.0,EMM25.0	EMM25.0	E3	ST191~	Lees J Nat. Commun. 7:12797
381	9262_5#47	33050V1S1	Fiji	2006	Skin	EMM25.1,EMM159.0	EMM25.1	E3	ST192	Lees J Nat. Commun. 7:12797
382	9262_5#48	33052V1S1	Fiji	2006	Skin	EMM75.1,EMM170.0	EMM75.1	E6	ST468	Lees J Nat. Commun. 7:12797
383	9262_5#49	33061V1S1	Fiji	2006	Skin	EMM105.0,	EMM105.0	M105	ST72~	Lees J Nat. Commun. 7:12797
384	9262_5#5	31097V2T1	Fiji	2006	Throat	EMM82.1,	EMM82.1	E3	ST320	Lees J Nat. Commun. 7:12797
385	9262_5#50	33080V1S1	Fiji	2006	Skin	EMM92.0,	EMM92.0	E2	ST599~	Lees J Nat. Commun. 7:12797
386	9262_5#51	33082V1S1	Fiji	2006	Skin	EMM71.0,	EMM71.0	D2	ST318	Lees J Nat. Commun. 7:12797
387	9262_5#52	33089V1S1	Fiji	2006	Skin	EMM166.2,EMM54.1	EMM54.1	D1	ST11~	Lees J Nat. Commun. 7:12797
388	9262_5#53	33100V1S1	Fiji	2006	Skin	EMM166.2,EMM54.1	EMM54.1	D1	ST11~	Lees J Nat. Commun. 7:12797
389	9262_5#54	33100V1S1	Fiji	2006	Skin	EMM54.1,EMM166.2	EMM54.1	D1	ST11~	Lees J Nat. Commun. 7:12797
390	9262_5#55	33107V1S1	Fiji	2006	Skin	EMM73.0,	EMM73.0	E4	ST739~	Lees J Nat. Commun. 7:12797
391	9262_5#56	33117V1S1	Fiji	2006	Skin	EMM33.0,EMM174.0	EMM33.0	D4	ST3	Lees J Nat. Commun. 7:12797
392	9262_5#57	33122V1S1	Fiji	2006	Skin	EMM167.0,EMM100.0	EMM100.0	D2	ST119	Lees J Nat. Commun. 7:12797
393	9262_5#58	33122V1S2	Fiji	2006	Skin	EMM86.2,	EMM86.2	D4	ST14~	Lees J Nat. Commun. 7:12797
394	9262_5#59	33124V1S1	Fiji	2006	Skin	EMM65.4,	EMM65.4	E6	ST129	Lees J Nat. Commun. 7:12797
395	9262_5#6	31001V1S1	Fiji	2006	Skin	EMM25.0,EMM159.0	EMM25.0	E3	ST191~	Lees J Nat. Commun. 7:12797
396	9262_5#60	33134V1S1	Fiji	2006	Skin	EMM58.0,EMM236.1	EMM58.0	E3	ST176	Lees J Nat. Commun. 7:12797
397	9262_5#61	33153V1S1	Fiji	2006	Skin	EMM65.4,	EMM65.4	E6	ST129	Lees J Nat. Commun. 7:12797
398	9262_5#62	33156V1S1	Fiji	2006	Skin	EMM86.2,	EMM86.2	D4	ST14~	Lees J Nat. Commun. 7:12797
399	9262_5#63	33156V1S2	Fiji	2006		EMM86.2,	EMM86.2	D4	ST14~	Lees J Nat. Commun. 7:12797
400	9262_5#64	33187V1S1	Fiji	2006	Skin	EMM25.1,EMM159.0	EMM25.1	E3	ST192	Lees J Nat. Commun. 7:12797
401	9262_5#65	33192V1S1	Fiji	2006	Skin	EMM103.0,	EMM103.0	E3	ST327	Lees J Nat. Commun. 7:12797
402	9262_5#66	33193V1S1	Fiji	2006	Skin	EMM25.1,EMM159.0	EMM25.1	E3	ST192	Lees J Nat. Commun. 7:12797
403	9262_5#67	33194V1S1	Fiji	2006	Skin	EMM100.0,EMM167.0	EMM100.0	D2	ST119	Lees J Nat. Commun. 7:12797
404	9262_5#68	33201V1S1	Fiji	2006	Skin	EMM92.0,	EMM92.0	E2	ST599~	Lees J Nat. Commun. 7:12797
405	9262_5#69	33052V2S1	Fiji	2006	Skin	EMM159.0,EMM25.0	EMM25.0	E3	ST191~	Lees J Nat. Commun. 7:12797
406	9262_5#7	31010V1S1	Fiji	2006	Skin	EMM25.0,EMM159.0	EMM25.0	E3	ST191~	Lees J Nat. Commun. 7:12797
407	9262_5#70	33094V2S1	Fiji	2006	Skin	EMM159.0,EMM25.0	EMM25.0	E3	ST191~	Lees J Nat. Commun. 7:12797
408	9262_5#71	33120V2S1	Fiji	2006	Skin	EMM174.0,EMM33.0	EMM33.0	D4	ST3	Lees J Nat. Commun. 7:12797
409	9262_5#72	33123V2S1	Fiji	2006	Skin	EMM71.0,	EMM71.0	D2	ST318	Lees J Nat. Commun. 7:12797
410	9262_5#73	33139V2S1	Fiji	2006	Skin	EMM85.0,EMM141.0	EMM85.0	E6	ST109	Lees J Nat. Commun. 7:12797
411	9262_5#74	33158V2S1	Fiji	2006	Skin	EMM19.4,EMM134.1	EMM19.4	M19	ST616	Lees J Nat. Commun. 7:12797
412	9262_5#75	33169V2S1	Fiji	2006	Skin	EMM19.4,EMM134.1	EMM19.4	M19	ST616	Lees J Nat. Commun. 7:12797
413	9262_5#76	33169V2S2	Fiji	2006	Skin	EMM19.4,EMM134.1	EMM19.4	M19	ST616	Lees J Nat. Commun. 7:12797
414	9262_5#77	33188V2S2	Fiji	2006	Skin	EMM73.0,	EMM73.0	E4	ST739~	Lees J Nat. Commun. 7:12797
415	9262_5#78	33189V2S2	Fiji	2006	Skin	EMM100.0,EMM167.0	EMM100.0	D2	ST119	Lees J Nat. Commun. 7:12797
416	9262_5#79	33190V2S1	Fiji	2006	Skin	EMM174.0,EMM33.0	EMM33.0	D4	ST3	Lees J Nat. Commun. 7:12797
417	9262_5#8	31012V1S1	Fiji	2006	Skin	EMM73.0,	EMM73.0	E4	ST739~	Lees J Nat. Commun. 7:12797
418	9262_5#80	33191V2S1	Fiji	2006	Skin	EMM134.2,EMM52.1	EMM52.1	D4	ST180	Lees J Nat. Commun. 7:12797
419	9262_5#81	33192V2S1	Fiji	2006	Skin	EMM159.0,EMM25.0	EMM25.0	E3	ST191~	Lees J Nat. Commun. 7:12797
420	9262_5#82	33194V2S1	Fiji	2006	Skin	EMM205.0,EMM101.0	EMM101.0	D4	ST182	Lees J Nat. Commun. 7:12797
421	9262_5#83	33011V3S1	Fiji	2006	Skin	EMM44.0,	EMM44.0	E3	ST178	Lees J Nat. Commun. 7:12797
422	9262_5#84	33016V3S1	Fiji	2006	Skin	EMM53.0,EMM174.1	EMM53.0	D4	ST363~	Lees J Nat. Commun. 7:12797
423	9262_5#85	33045V3S1	Fiji	2006	Skin	EMM105.0,	EMM105.0	M105	ST72~	Lees J Nat. Commun. 7:12797
424	9262_5#86	33080V3S1	Fiji	2006	Skin	EMM82.1,	EMM82.1	E3	ST320	Lees J Nat. Commun. 7:12797
425	9262_5#87	33093V3S1	Fiji	2006	Skin	EMM71.0,	EMM71.0	D2	ST318	Lees J Nat. Commun. 7:12797
426	9262_5#88	33101V3S1	Fiji	2006	Skin	EMM65.4,	EMM65.4	E6	ST129	Lees J Nat. Commun. 7:12797
427	9262_5#89	33107V3S1	Fiji	2006	Skin	EMM89.14,EMM236.2	EMM89.14	E4	ST380	Lees J Nat. Commun. 7:12797
428	9262_5#9	31032V1S2	Fiji	2006	Skin	EMM25.0,EMM159.0	EMM25.0	E3	ST191~	Lees J Nat. Commun. 7:12797
429	9262_5#90	33115V3S1	Fiji	2006	Skin	EMM93.4,EMM174.1,EMM156.0	EMM93.4	D4	ST814	Lees J Nat. Commun. 7:12797
430	9262_5#91	33119V3S1	Fiji	2006	Skin	EMM205.0,EMM123.0	EMM123.0	D3	ST325	Lees J Nat. Commun. 7:12797
431	9262_5#92	33126V3S1	Fiji	2006	Skin	EMM73.0,	EMM73.0	E4	ST739~	Lees J Nat. Commun. 7:12797
432	9262_5#93	33132V3S1	Fiji	2006	Skin	EMM101.0,EMM205.0	EMM101.0	D4	ST182	Lees J Nat. Commun. 7:12797
433	9262_5#94	33139V3S1	Fiji	2006	Skin	EMM60.7,	EMM60.7	E1	ST193	Lees J Nat. Commun. 7:12797
434	9262_5#95	33139V3S2	Fiji	2006		EMM60.7,	EMM60.7	E1	ST193	Lees J Nat. Commun. 7:12797
435	9262_6#1	31158V1S1_01	Fiji	2006	Skin	EMM159.0,EMM25.0	EMM25.0	E3	ST191~	Lees J Nat. Commun. 7:12797
436	9262_6#11	31158V1S2	Fiji	2006		EMM25.0,EMM159.0	EMM25.0	E3	ST191~	Lees J Nat. Commun. 7:12797
437	9262_6#21	31158V3S1	Fiji	2006	Skin	EMM93.4,EMM174.1,EMM156.0	EMM93.4	D4	ST814	Lees J Nat. Commun. 7:12797
438	9262_6#31	31158V3S2_01	Fiji	2006	Skin	EMM89.14,EMM236.2	EMM89.14	E4	ST380	Lees J Nat. Commun. 7:12797
439	9262_6#41	31158V4S1	Fiji	2006	Skin	EMM89.14,EMM236.2	EMM89.14	E4	ST380	Lees J Nat. Commun. 7:12797
440	9262_6#51	31158V5S1_01	Fiji	2006	Skin	EMM49.0,EMM236.2	EMM49.0	E3	ST433	Lees J Nat. Commun. 7:12797
441	9262_6#61	33181V1T1_01	Fiji	2006	Throat	EMM137.0,	EMM137.0	E5	ST268	Lees J Nat. Commun. 7:12797
442	9262_6#71	33181V3S1	Fiji	2006	Skin	EMM218.1,	EMM218.1	M218	ST292	Lees J Nat. Commun. 7:12797
443	9262_6#81	33181V3T1	Fiji	2006	Throat	EMM205.0,EMM101.0	EMM101.0	D4	ST182	Lees J Nat. Commun. 7:12797
444	9262_6#91	33181V4T1	Fiji	2006	Throat	EMM205.0,	EMM205.0	E5	ST182	Lees J Nat. Commun. 7:12797
445	9262_7#1	31086V2S2	Fiji	2006	Skin	EMM70.0,EMM174.1	EMM70.0	D4	ST10	Lees J Nat. Commun. 7:12797
446	9262_7#12	31142V2S1	Fiji	2006	Skin	EMM70.0,EMM174.1	EMM70.0	D4	ST10	Lees J Nat. Commun. 7:12797
447	9262_7#13	31144V2S1	Fiji	2006	Skin	EMM82.1,	EMM82.1	E3	ST320	Lees J Nat. Commun. 7:12797
448	9262_7#14	31152V2S1	Fiji	2006	Skin	EMM93.4,EMM174.1,EMM156.0	EMM93.4	D4	ST814	Lees J Nat. Commun. 7:12797
449	9262_7#15	31154V2S1	Fiji	2006	Skin	EMM25.0,EMM159.0	EMM25.0	E3	ST191~	Lees J Nat. Commun. 7:12797
450	9262_7#16	31165V2S1	Fiji	2006	Skin	EMM93.4,EMM174.1,EMM156.0	EMM93.4	D4	ST814	Lees J Nat. Commun. 7:12797
451	9262_7#17	31166V2S1	Fiji	2006	Skin	EMM82.1,	EMM82.1	E3	ST320	Lees J Nat. Commun. 7:12797
452	9262_7#18	31168V2S1	Fiji	2006	Skin	EMM70.0,EMM174.1	EMM70.0	D4	ST10	Lees J Nat. Commun. 7:12797
453	9262_7#19	31170V2S1	Fiji	2006	Skin	EMM82.1,	EMM82.1	E3	ST320	Lees J Nat. Commun. 7:12797
454	9262_7#20	31175V2S1	Fiji	2006	Skin	EMM70.0,EMM174.1	EMM70.0	D4	ST10	Lees J Nat. Commun. 7:12797
455	9262_7#21	31176V2S2	Fiji	2006	Skin	EMM103.0,	EMM103.0	E3	ST327	Lees J Nat. Commun. 7:12797
456	9262_7#22	31010V3S1	Fiji	2006	Skin	EMM205.0,EMM123.0	EMM123.0	D3	ST325	Lees J Nat. Commun. 7:12797
457	9262_7#23	31013V3S1	Fiji	2006	Skin	EMM82.1,	EMM82.1	E3	ST320	Lees J Nat. Commun. 7:12797
458	9262_7#24	31029V3S1	Fiji	2006	Skin	EMM57.0,EMM166.1	EMM57.0	M57	ST348~	Lees J Nat. Commun. 7:12797
459	9262_7#25	31048V3S1	Fiji	2006	Skin	EMM25.0,EMM159.0	EMM25.0	E3	ST191~	Lees J Nat. Commun. 7:12797
460	9262_7#26	31050V3S1	Fiji	2006	Skin	EMM103.0,	EMM103.0	E3	ST327	Lees J Nat. Commun. 7:12797
461	9262_7#28	31069V3S1	Fiji	2006	Skin	EMM4.5,	EMM4.5	E1	ST289~	Lees J Nat. Commun. 7:12797
462	9262_7#3	31089V2S1	Fiji	2006	Skin	EMM4.5,	EMM4.5	E1	ST289~	Lees J Nat. Commun. 7:12797
463	9262_7#30	31086V3S1	Fiji	2006	Skin	EMM104.0,EMM149.0	EMM104.0	E2	ST789	Lees J Nat. Commun. 7:12797
464	9262_7#31	31089V3S1	Fiji	2006	Skin	EMM70.0,EMM174.1	EMM70.0	D4	ST10	Lees J Nat. Commun. 7:12797
465	9262_7#32	31094V3S1	Fiji	2006	Skin	EMM82.1,	EMM82.1	E3	ST320	Lees J Nat. Commun. 7:12797
466	9262_7#33	31099V3S1	Fiji	2006	Skin	EMM205.0,EMM123.0	EMM123.0	D3	ST325	Lees J Nat. Commun. 7:12797
467	9262_7#34	31118V3S1	Fiji	2006	Skin	EMM82.1,	EMM82.1	E3	ST320	Lees J Nat. Commun. 7:12797
468	9262_7#35	31118V3S2	Fiji	2006	Skin	EMM74.0,EMM156.0	EMM74.0	M74	ST120	Lees J Nat. Commun. 7:12797
469	9262_7#37	31128V3S1	Fiji	2006	Skin	EMM42.0,	EMM42.0	E6	ST80	Lees J Nat. Commun. 7:12797
470	9262_7#38	31132V3S1	Fiji	2006	Skin	EMM65.4,	EMM65.4	E6	ST129	Lees J Nat. Commun. 7:12797
471	9262_7#39	31143V3S1	Fiji	2006	Skin	EMM89.14,EMM236.2	EMM89.14	E4	ST380	Lees J Nat. Commun. 7:12797
472	9262_7#4	31104V2S1	Fiji	2006	Skin	EMM4.5,	EMM4.5	E1	ST289~	Lees J Nat. Commun. 7:12797
473	9262_7#40	31147V3S1	Fiji	2006	Skin	EMM56.0,EMM205.0	EMM56.0	D4	ST115	Lees J Nat. Commun. 7:12797
474	9262_7#41	31158V3S1a	Fiji	2006	Skin	EMM174.1,EMM156.0,EMM93.4	EMM93.4	D4	ST814	Lees J Nat. Commun. 7:12797
475	9262_7#42	31158V3S1b	Fiji	2006	Skin	EMM89.14,EMM236.2	EMM89.14	E4	ST380	Lees J Nat. Commun. 7:12797
476	9262_7#43	31163V3S1	Fiji	2006	Skin	EMM97.1,	EMM97.1	D5	ST216	Lees J Nat. Commun. 7:12797
477	9262_7#44	31170V3S1	Fiji	2006	Skin	EMM73.0,	EMM73.0	E4	ST739~	Lees J Nat. Commun. 7:12797
478	9262_7#45	31171V3S1	Fiji	2006	Skin	EMM174.1,EMM156.0,EMM93.4	EMM93.4	D4	ST814	Lees J Nat. Commun. 7:12797
479	9262_7#46	31177V3S1	Fiji	2006	Skin	EMM123.0,EMM205.0	EMM123.0	D3	ST325	Lees J Nat. Commun. 7:12797
480	9262_7#47	31004V4S1	Fiji	2006	Skin	EMM93.4,EMM174.1,EMM156.0	EMM93.4	D4	ST814	Lees J Nat. Commun. 7:12797
481	9262_7#48	31009V4S1	Fiji	2006	Skin	EMM174.1,EMM156.0,EMM93.4	EMM93.4	D4	ST814	Lees J Nat. Commun. 7:12797
482	9262_7#49	31032V4S1	Fiji	2006	Skin	EMM104.0,EMM149.0	EMM104.0	E2	ST789	Lees J Nat. Commun. 7:12797
483	9262_7#50	31034V4S1	Fiji	2006	#N/A	EMM57.0,EMM166.1	EMM57.0	M57	ST348~	Lees J Nat. Commun. 7:12797
484	9262_7#52	31037V4S1	Fiji	2006	Skin	EMM70.0,EMM174.1	EMM70.0	D4	ST10	Lees J Nat. Commun. 7:12797
485	9262_7#53	31044V4S1	Fiji	2006	Skin	EMM137.0,EMM39.4	EMM39.4	A-C4	ST268	Lees J Nat. Commun. 7:12797
486	9262_7#54	31053V4S1	Fiji	2006	Skin	EMM174.1,EMM156.0,EMM93.4	EMM93.4	D4	ST814	Lees J Nat. Commun. 7:12797
487	9262_7#55	31058V4S1	Fiji	2006	Skin	EMM103.0,	EMM103.0	E3	ST327	Lees J Nat. Commun. 7:12797
488	9262_7#56	31059V4S1	Fiji	2006	Skin	EMM93.4,EMM174.1,EMM156.0	EMM93.4	D4	ST814	Lees J Nat. Commun. 7:12797
489	9262_7#57	31063V4S1	Fiji	2006	Skin	EMM70.0,EMM174.1	EMM70.0	D4	ST10	Lees J Nat. Commun. 7:12797
490	9262_7#58	31075V4S1	Fiji	2006	Skin	EMM11.0,EMM202.1	EMM11.0	E6	ST547~	Lees J Nat. Commun. 7:12797
491	9262_7#59	31077V4S1	Fiji	2006	Skin	EMM65.4,	EMM65.4	E6	ST129	Lees J Nat. Commun. 7:12797
492	9262_7#6	31107V2S1	Fiji	2006	Skin	EMM105.0,	EMM105.0	M105	ST72~	Lees J Nat. Commun. 7:12797
493	9262_7#60	31081V4S1	Fiji	2006	Skin	EMM65.4,	EMM65.4	E6	ST129	Lees J Nat. Commun. 7:12797
494	9262_7#61	31088V4S1	Fiji	2006	Skin	EMM137.0,EMM39.4	EMM39.4	A-C4	ST268	Lees J Nat. Commun. 7:12797
495	9262_7#62	31091V4S1	Fiji	2006	Skin	EMM97.1,	EMM97.1	D5	ST216	Lees J Nat. Commun. 7:12797
496	9262_7#63	31101V4S1	Fiji	2006	Skin	EMM89.14,EMM236.2	EMM89.14	E4	ST380	Lees J Nat. Commun. 7:12797
497	9262_7#64	31109V4S1	Fiji	2006	Skin	EMM174.1,EMM156.0,EMM93.4	EMM93.4	D4	ST814	Lees J Nat. Commun. 7:12797
498	9262_7#66	31114V4S1	Fiji	2006	Skin	EMM174.1,EMM156.0,EMM93.4	EMM93.4	D4	ST814	Lees J Nat. Commun. 7:12797
499	9262_7#67	31117V4S1	Fiji	2006	Skin	EMM89.14,EMM236.2	EMM89.14	E4	ST380	Lees J Nat. Commun. 7:12797
500	9262_7#68	31119V4S1	Fiji	2006	Skin	EMM89.14,EMM236.2	EMM89.14	E4	ST380	Lees J Nat. Commun. 7:12797
501	9262_7#7	31118V2S1	Fiji	2006	Skin	EMM65.4,	EMM65.4	E6	ST129	Lees J Nat. Commun. 7:12797
502	9262_7#70	31121V4S1	Fiji	2006	Skin	EMM39.4,EMM137.0	EMM39.4	A-C4	ST268	Lees J Nat. Commun. 7:12797
503	9262_7#71	31124V4S1	Fiji	2006	Skin	EMM65.4,	EMM65.4	E6	ST129	Lees J Nat. Commun. 7:12797
504	9262_7#72	31125V4S1	Fiji	2006	Skin	EMM65.4,	EMM65.4	E6	ST129	Lees J Nat. Commun. 7:12797
505	9262_7#73	31128V4S1	Fiji	2006	Skin	EMM11.0,EMM202.1	EMM11.0	E6	ST547~	Lees J Nat. Commun. 7:12797
506	9262_7#74	31129V4S1	Fiji	2006	Skin	EMM137.0,EMM39.4	EMM39.4	A-C4	ST268	Lees J Nat. Commun. 7:12797
507	9262_7#75	31134V4S1	Fiji	2006	Skin	EMM39.4,EMM137.0	EMM39.4	A-C4	ST268	Lees J Nat. Commun. 7:12797
508	9262_7#76	31136V4S1	Fiji	2006	Skin	EMM49.0,EMM236.2	EMM49.0	E3	ST433	Lees J Nat. Commun. 7:12797
509	9262_7#77	31148V4S1	Fiji	2006	Skin	EMM70.0,EMM174.1	EMM70.0	D4	ST10	Lees J Nat. Commun. 7:12797
510	9262_7#78	31165V4S1	Fiji	2006		EMM56.0,EMM205.0	EMM56.0	D4	ST115	Lees J Nat. Commun. 7:12797
511	9262_7#79	31167V4S1	Fiji	2006	Skin	EMM11.0,EMM202.1	EMM11.0	E6	ST547~	Lees J Nat. Commun. 7:12797
512	9262_7#80	31176V4S1	Fiji	2006	Skin	EMM236.2,EMM76.4	EMM76.4	E2	ST353~	Lees J Nat. Commun. 7:12797
513	9262_7#81	33160V2T1	Fiji	2006	Throat	EMM92.0,	EMM92.0	E2	ST599~	Lees J Nat. Commun. 7:12797
514	9262_7#82	33157V2T1	Fiji	2006	Throat	EMM101.0,EMM205.0	EMM101.0	D4	ST182	Lees J Nat. Commun. 7:12797
515	9262_7#83	33141V2T1	Fiji	2006	Throat	EMM25.1,EMM159.0	EMM25.1	E3	ST192	Lees J Nat. Commun. 7:12797
516	9262_7#84	33098V2T1	Fiji	2006	Throat	EMM44.0,	EMM44.0	E3	ST178	Lees J Nat. Commun. 7:12797
517	9262_7#85	33181V3T1	Fiji	2006	Throat	EMM101.0,EMM205.0	EMM101.0	D4	ST182	Lees J Nat. Commun. 7:12797
518	9262_7#86	33133V3T1	Fiji	2006	Throat	EMM226.0,EMM238.2	EMM238.2	A-C3	ST867	Lees J Nat. Commun. 7:12797
519	9262_7#87	33092V2T1	Fiji	2006	Throat	EMM49.0,EMM236.2	EMM49.0	E3	ST433	Lees J Nat. Commun. 7:12797
520	9262_7#88	33141V4T1	Fiji	2006	Throat	EMM238.2,EMM226.0	EMM238.2	A-C3	ST867	Lees J Nat. Commun. 7:12797
521	9262_7#89	33138V3T1	Fiji	2006	Throat	EMM122.2,	EMM122.2	M122	ST412~	Lees J Nat. Commun. 7:12797
522	9262_7#9	31124V2S1	Fiji	2006	Skin	EMM71.0,	EMM71.0	D2	ST318	Lees J Nat. Commun. 7:12797
523	9262_7#91	33124V2T1	Fiji	2006	Throat	EMM166.2,EMM54.1	EMM54.1	D1	ST11~	Lees J Nat. Commun. 7:12797
524	9262_7#92	31027V4S1	Fiji	2006	Skin	EMM57.0,EMM166.1	EMM57.0	M57	ST348~	Lees J Nat. Commun. 7:12797
525	9475_2#58	33181V5T1	Fiji	2006	Throat	EMM205.0,EMM101.0	EMM101.0	D4	ST182	Lees J Nat. Commun. 7:12797
526	9475_2#68	33181V6T1	Fiji	2006	Throat	EMM92.0,	EMM92.0	E2	ST599~	Lees J Nat. Commun. 7:12797
527	6753_5#30	HKU30	Hong Kong	2011	Throat swab	EMM12.0,	EMM12.0	A-C4	ST36	Davies M Nat gen
528	6817_3#6	HKU22	Hong Kong	2011	Throat swab	EMM12.0,	EMM12.0	A-C4	ST36	Davies M Nat gen
529	6817_3#62	HKU165	Hong Kong	2005	Sputum	EMM12.0,	EMM12.0	A-C4	ST36	Davies M Nat gen
530	6817_3#70	HKU306	Hong Kong	2011	Throat swab	EMM12.0,	EMM12.0	A-C4	ST36	Davies M Nat gen
531	6817_3#95	HKU360	Hong Kong	2011	Throat swab	EMM12.0,	EMM12.0	A-C4	ST36	Davies M Nat gen
532	6817_4#22	HKU383	Hong Kong	2011	Throat swab	EMM12.0,	EMM12.0	A-C4	ST36	Davies M Nat gen
533	6817_4#27	HKU388	Hong Kong	2011	Throat swab	EMM12.0,	EMM12.0	A-C4	ST36	Davies M Nat gen
534	6817_4#3	HKU364	Hong Kong	2008	Vaginal swab	EMM12.0,	EMM12.0	A-C4	ST36	Davies M Nat gen
535	6817_4#36	HKU397	Hong Kong	2011	Throat swab	EMM12.0,	EMM12.0	A-C4	ST36	Davies M Nat gen
536	8113_6#71	HKU434	Hong Kong	2011	Throat swab	EMM1.0,	EMM1.0	A-C3	ST28	Ben Zakour N sci rep
537	8113_6#74	HKU464	Hong Kong	2012	Blood culture	EMM1.0,	EMM1.0	A-C3	ST28	Ben Zakour N sci rep
538	8113_6#76	HKU474	Hong Kong	2012	Throat swab	EMM1.0,	EMM1.0	A-C3	ST28	Ben Zakour N sci rep
539	8113_6#78	HKU484	Hong Kong	2012	Throat swab	EMM1.0,	EMM1.0	A-C3	ST28	Ben Zakour N sci rep
540	8113_6#80	HKU486	Hong Kong	2011	Throat swab	EMM1.0,	EMM1.0	A-C3	ST28	Ben Zakour N sci rep
541	8113_6#81	HKU487	Hong Kong	2011	Throat swab	EMM1.0,	EMM1.0	A-C3	ST28	Ben Zakour N sci rep
542	8113_6#82	HKU488	Hong Kong	2012	Throat swab	EMM1.0,	EMM1.0	A-C3	ST28	Ben Zakour N sci rep
543	11791_7#71	K3534	Kenya	1998	blood	EMM65.0,	EMM65.0	E6	ST716	Seale A Emerg Infect Dis. 2016 Feb;22(2):224-32.
544	11791_7#72	K3589	Kenya	1998	blood	EMM8.3,	EMM8.3	E4	ST241	Seale A Emerg Infect Dis. 2016 Feb;22(2):224-32.
545	11791_7#73	K5499	Kenya	2000	swab	EMM65.5,	EMM65.5	E6	ST215	Seale A Emerg Infect Dis. 2016 Feb;22(2):224-32.
546	11791_7#74	K5721	Kenya	2000	swab	EMM26.3,	EMM26.3	M26	ST745	Seale A Emerg Infect Dis. 2016 Feb;22(2):224-32.
547	11791_7#75	K5911	Kenya	2000	blood	EMM217.0,EMM156.0	EMM217.0	D3	ST728	Seale A Emerg Infect Dis. 2016 Feb;22(2):224-32.
548	11791_7#77	K6239	Kenya	2000	blood	EMM9.0,EMM149.2	EMM9.0	E3	ST740	Seale A Emerg Infect Dis. 2016 Feb;22(2):224-32.
549	11791_7#78	K6429	Kenya	2000	swab	EMM38.1,	EMM38.1	M38	ST757	Seale A Emerg Infect Dis. 2016 Feb;22(2):224-32.
550	11791_7#79	K6821	Kenya	2001	swab	EMM177.0,EMM164.3	EMM177.0	E6	ST758	Seale A Emerg Infect Dis. 2016 Feb;22(2):224-32.
551	11791_7#80	K7367	Kenya	2001	swab	EMM55.0,	EMM55.0	M55	ST248	Seale A Emerg Infect Dis. 2016 Feb;22(2):224-32.
552	11791_7#81	K9340	Kenya	2002	swab	EMM18.21,EMM167.0	EMM18.21	M18	ST221	Seale A Emerg Infect Dis. 2016 Feb;22(2):224-32.
553	11791_7#82	K9404	Kenya	2002	blood	EMM90.5,	EMM90.5	E2	ST708	Seale A Emerg Infect Dis. 2016 Feb;22(2):224-32.
554	11791_7#83	K9429	Kenya	2002	blood	EMM95.0,EMM205.0	EMM95.0	E2	ST712	Seale A Emerg Infect Dis. 2016 Feb;22(2):224-32.
555	11791_7#84	K9466	Kenya	2002	blood	EMM78.5,	EMM78.5	E1	ST255	Seale A Emerg Infect Dis. 2016 Feb;22(2):224-32.
556	11791_7#85	K12363	Kenya	2004	blood	EMM79.5,	EMM79.5	E3	ST714	Seale A Emerg Infect Dis. 2016 Feb;22(2):224-32.
557	11791_7#86	K12452	Kenya	2004	blood	EMM183.2,EMM149.0	EMM183.2	E3	ST761	Seale A Emerg Infect Dis. 2016 Feb;22(2):224-32.
558	11791_7#87	K13569	Kenya	2004	blood	EMM63.5,	EMM63.5	E6	ST764	Seale A Emerg Infect Dis. 2016 Feb;22(2):224-32.
559	11791_7#88	K16587	Kenya	2005	swab	STG866.1,EMM166.1	STG866.1	NT	ST450	Seale A Emerg Infect Dis. 2016 Feb;22(2):224-32.
560	11791_7#89	K16849	Kenya	2005	blood	EMM83.12,EMM205.0	EMM83.12	D4	ST393	Seale A Emerg Infect Dis. 2016 Feb;22(2):224-32.
561	11791_7#90	K19464	Kenya	2006	blood	STG653.1,	STG653.1	NT	ST254	Seale A Emerg Infect Dis. 2016 Feb;22(2):224-32.
562	11791_7#91	K24357	Kenya	2007	swab	EMM209.0,	EMM209.0	E3	ST260	Seale A Emerg Infect Dis. 2016 Feb;22(2):224-32.
563	11791_7#92	K35215	Kenya	2008	swab	STG866.1,EMM166.1	STG866.1	NT	ST450	Seale A Emerg Infect Dis. 2016 Feb;22(2):224-32.
564	11791_7#93	K39244	Kenya	2009	swab	EMM205.1,EMM80.0	EMM80.0	D4	ST715	Seale A Emerg Infect Dis. 2016 Feb;22(2):224-32.
565	11791_7#94	K47483	Kenya	2011	swab	EMM225.0,	EMM225.0	D4	ST262	Seale A Emerg Infect Dis. 2016 Feb;22(2):224-32.
566	11791_7#95	K51725	Kenya	2011	swab	EMM18.21,EMM167.0	EMM18.21	M18	ST402	Seale A Emerg Infect Dis. 2016 Feb;22(2):224-32.
567	11822_8#11	K9374	Kenya	2002	swab	EMM18.21,EMM167.0	EMM18.21	M18	ST221	Seale A Emerg Infect Dis. 2016 Feb;22(2):224-32.
568	11822_8#12	K9400	Kenya	2002	blood	EMM90.5,	EMM90.5	E2	ST708	Seale A Emerg Infect Dis. 2016 Feb;22(2):224-32.
569	11822_8#13	K9887	Kenya	2003	blood	EMM138.0,EMM119.2	EMM119.2	D4	ST239	Seale A Emerg Infect Dis. 2016 Feb;22(2):224-32.
570	11822_8#14	K9927	Kenya	2003	swab	EMM223.0,EMM138.0	EMM223.0	D4	ST613	Seale A Emerg Infect Dis. 2016 Feb;22(2):224-32.
571	11822_8#15	K10234	Kenya	2003	blood	EMM65.5,	EMM65.5	E6	ST215	Seale A Emerg Infect Dis. 2016 Feb;22(2):224-32.
572	11822_8#16	K10246	Kenya	2003	swab	EMM162.1,EMM205.0	EMM162.1	NT	ST412	Seale A Emerg Infect Dis. 2016 Feb;22(2):224-32.
573	11822_8#17	K12537	Kenya	2004	CSF	EMM103.0,	EMM103.0	E3	ST233	Seale A Emerg Infect Dis. 2016 Feb;22(2):224-32.
574	11822_8#18	K13254	Kenya	2004	blood	EMM63.5,	EMM63.5	E6	ST764	Seale A Emerg Infect Dis. 2016 Feb;22(2):224-32.
575	11822_8#19	K17011	Kenya	2005	blood	EMM79.5,	EMM79.5	E3	ST714	Seale A Emerg Infect Dis. 2016 Feb;22(2):224-32.
576	11822_8#20	K17074	Kenya	2005	swab	EMM218.1,	EMM218.1	M218	ST292	Seale A Emerg Infect Dis. 2016 Feb;22(2):224-32.
577	11822_8#21	K19188	Kenya	2006	blood	EMM8.3,	EMM8.3	E4	ST505	Seale A Emerg Infect Dis. 2016 Feb;22(2):224-32.
578	11822_8#23	K21771	Kenya	2007	blood	EMM60.7,	EMM60.7	E1	ST700	Seale A Emerg Infect Dis. 2016 Feb;22(2):224-32.
579	11822_8#25	K36563	Kenya	2009	blood	EMM229.0,	EMM229.0	A-C4	ST703	Seale A Emerg Infect Dis. 2016 Feb;22(2):224-32.
580	11822_8#26	K38470	Kenya	2009	swab	EMM18.21,EMM167.0	EMM18.21	M18	ST402	Seale A Emerg Infect Dis. 2016 Feb;22(2):224-32.
581	11822_8#27	K42952	Kenya	2010	swab	EMM111.2,	EMM111.2	M111	ST737	Seale A Emerg Infect Dis. 2016 Feb;22(2):224-32.
582	11822_8#28	K43037	Kenya	2010	blood	EMM44.0,	EMM44.0	E3	ST178	Seale A Emerg Infect Dis. 2016 Feb;22(2):224-32.
583	11822_8#29	K50977	Kenya	2011	blood	EMM179.0,	EMM179.0	M179	ST619	Seale A Emerg Infect Dis. 2016 Feb;22(2):224-32.
584	11822_8#4	K6847	Kenya	2001	swab	EMM65.5,	EMM65.5	E6	ST215	Seale A Emerg Infect Dis. 2016 Feb;22(2):224-32.
585	11822_8#5	K6932	Kenya	2001	blood	EMM217.0,EMM156.0	EMM217.0	D3	ST728	Seale A Emerg Infect Dis. 2016 Feb;22(2):224-32.
586	11822_8#6	K7275	Kenya	2001	swab	STG866.1,EMM166.1	STG866.1	NT	ST450	Seale A Emerg Infect Dis. 2016 Feb;22(2):224-32.
587	11822_8#7	K7478	Kenya	2001	blood	EMM65.5,	EMM65.5	E6	ST215	Seale A Emerg Infect Dis. 2016 Feb;22(2):224-32.
588	11822_8#9	K7928	Kenya	2001	swab	EMM4.5,	EMM4.5	E1	ST771	Seale A Emerg Infect Dis. 2016 Feb;22(2):224-32.
589	8849_2#10	K37990	Kenya	2009	blood	EMM64.3,EMM138.0	EMM64.3	D4	ST223	Seale A Emerg Infect Dis. 2016 Feb;22(2):224-32.
590	8849_2#14	K42771	Kenya	2010	blood	EMM124.2,	EMM124.2	E4	ST231	Seale A Emerg Infect Dis. 2016 Feb;22(2):224-32.
591	8849_2#17	K48186	Kenya	2011	swab	STG1750.0,EMM166.1	stg1750.0	NT	ST731	Seale A Emerg Infect Dis. 2016 Feb;22(2):224-32.
592	8849_2#18	K48650	Kenya	2011		EMM44.0,	EMM44.0	E3	ST178	Seale A Emerg Infect Dis. 2016 Feb;22(2):224-32.
593	8849_2#19	K47581	Kenya	2011	swab	EMM80.0,EMM205.1	EMM80.0	D4	ST729	Seale A Emerg Infect Dis. 2016 Feb;22(2):224-32.
594	8849_2#2	K16727	Kenya	2005	swab	EMM65.0,	EMM65.0	E6	ST778	Seale A Emerg Infect Dis. 2016 Feb;22(2):224-32.
595	8849_2#20	K48083	Kenya	2011	swab	EMM179.0,	EMM179.0	M179	ST619	Seale A Emerg Infect Dis. 2016 Feb;22(2):224-32.
596	8849_2#21	K47118	Kenya	2011	swab	EMM217.0,EMM156.0	EMM217.0	D3	ST728	Seale A Emerg Infect Dis. 2016 Feb;22(2):224-32.
597	8849_2#23	K46187	Kenya	2010	swab	EMM68.8,EMM203.3	EMM68.8	E2	ST726	Seale A Emerg Infect Dis. 2016 Feb;22(2):224-32.
598	8849_2#24	K47020	Kenya	2011	aspirate	EMM80.0,EMM205.1	EMM80.0	D4	ST701	Seale A Emerg Infect Dis. 2016 Feb;22(2):224-32.
599	8849_2#25	K37698	Kenya	2009	CSF	EMM85.1,	EMM85.1	E6	ST774	Seale A Emerg Infect Dis. 2016 Feb;22(2):224-32.
600	8849_2#26	K37698	Kenya	2009	CSF	EMM85.1,	EMM85.1	E6	ST709	Seale A Emerg Infect Dis. 2016 Feb;22(2):224-32.
601	8849_2#28	K50105	Kenya	2011	swab	EMM22.5,	EMM22.5	E4	ST213	Seale A Emerg Infect Dis. 2016 Feb;22(2):224-32.
602	8849_2#29	K30465	Kenya	2008	swab	EMM8.3,	EMM8.3	E4	ST505	Seale A Emerg Infect Dis. 2016 Feb;22(2):224-32.
603	8849_2#3	K23653	Kenya	2007	swab	EMM8.3,	EMM8.3	E4	ST241	Seale A Emerg Infect Dis. 2016 Feb;22(2):224-32.
604	8849_2#31	K27345	Kenya	2007	swab	STG866.1,EMM166.1	STG866.1	NT	ST450	Seale A Emerg Infect Dis. 2016 Feb;22(2):224-32.
605	8849_2#32	K28044	Kenya	2007	blood	EMM25.1,EMM159.0	EMM25.1	E3	ST323	Seale A Emerg Infect Dis. 2016 Feb;22(2):224-32.
606	8849_2#33	K36535	Kenya	2009	swab	EMM100.2,EMM174.1	EMM100.2	D2	ST773	Seale A Emerg Infect Dis. 2016 Feb;22(2):224-32.
607	8849_2#34	K37741	Kenya	2009	blood	EMM239.1,EMM166.1	EMM239.1	A-C3	ST776	Seale A Emerg Infect Dis. 2016 Feb;22(2):224-32.
608	8849_2#35	K5797	Kenya	2000	swab	EMM77.0,EMM149.2	EMM77.0	E4	ST747	Seale A Emerg Infect Dis. 2016 Feb;22(2):224-32.
609	8849_2#36	K6102	Kenya	2000	swab	EMM109.1,	EMM109.1	E4	ST718	Seale A Emerg Infect Dis. 2016 Feb;22(2):224-32.
610	8849_2#37	K45527	Kenya	2010	blood	EMM138.0,EMM192.0	EMM192.0	D4	ST724	Seale A Emerg Infect Dis. 2016 Feb;22(2):224-32.
611	8849_2#38	K45900	Kenya	2010	swab	EMM118.2,	EMM118.2	E3	ST725	Seale A Emerg Infect Dis. 2016 Feb;22(2):224-32.
612	8849_2#39	K44869	Kenya	2010	swab	STG866.1,EMM166.1	STG866.1	NT	ST450	Seale A Emerg Infect Dis. 2016 Feb;22(2):224-32.
613	8849_2#4	K21345	Kenya	2007	swab	STG866.1,EMM166.1	STG866.1	NT	ST265	Seale A Emerg Infect Dis. 2016 Feb;22(2):224-32.
614	8849_2#40	K44896	Kenya	2010	blood	EMM99.5,	EMM99.5	E6	ST781	Seale A Emerg Infect Dis. 2016 Feb;22(2):224-32.
615	8849_2#41	K44098	Kenya	2010	blood	EMM18.21,EMM167.0	EMM18.21	M18	ST402	Seale A Emerg Infect Dis. 2016 Feb;22(2):224-32.
616	8849_2#42	K44582	Kenya	2010	swab	EMM57.0,EMM166.1	EMM57.0	M57	ST723	Seale A Emerg Infect Dis. 2016 Feb;22(2):224-32.
617	8849_2#43	K43101	Kenya	2010	aspirate	EMM55.0,	EMM55.0	M55	ST248	Seale A Emerg Infect Dis. 2016 Feb;22(2):224-32.
618	8849_2#44	K43304	Kenya	2010	aspirate	EMM18.21,EMM167.0	EMM18.21	M18	ST402	Seale A Emerg Infect Dis. 2016 Feb;22(2):224-32.
619	8849_2#45	K48877	Kenya	2011	aspirate	EMM74.0,EMM156.0	EMM74.0	M74	ST732	Seale A Emerg Infect Dis. 2016 Feb;22(2):224-32.
620	8849_2#46	K49285	Kenya	2011	swab	EMM103.0,	EMM103.0	E3	ST733	Seale A Emerg Infect Dis. 2016 Feb;22(2):224-32.
621	8849_2#47	K48807	Kenya	2011	blood	EMM170.0,EMM75.1	EMM75.1	E6	ST704	Seale A Emerg Infect Dis. 2016 Feb;22(2):224-32.
622	8849_2#48	K48817	Kenya	2011	blood	EMM74.0,EMM156.0	EMM74.0	M74	ST120	Seale A Emerg Infect Dis. 2016 Feb;22(2):224-32.
623	8849_2#49	K12434	Kenya	2004	swab	EMM44.0,	EMM44.0	E3	ST178	Seale A Emerg Infect Dis. 2016 Feb;22(2):224-32.
624	8849_2#50	K25147	Kenya	2007	blood	EMM90.5,	EMM90.5	E2	ST708	Seale A Emerg Infect Dis. 2016 Feb;22(2):224-32.
625	8849_2#51	K31028	Kenya	2008	swab	EMM93.6,	EMM93.6	D4	ST613	Seale A Emerg Infect Dis. 2016 Feb;22(2):224-32.
626	8849_2#52	K11898	Kenya	2004	swab	EMM111.2,	EMM111.2	M111	ST737	Seale A Emerg Infect Dis. 2016 Feb;22(2):224-32.
627	8849_2#53	K16781	Kenya	2005	swab	STG866.1,EMM166.1	STG866.1	NT	ST450	Seale A Emerg Infect Dis. 2016 Feb;22(2):224-32.
628	8849_2#54	K16837	Kenya	2005	swab	EMM83.12,EMM205.0	EMM83.12	D4	ST393	Seale A Emerg Infect Dis. 2016 Feb;22(2):224-32.
629	8849_2#55	K13994	Kenya	2005	blood	EMM77.0,EMM149.2	EMM77.0	E4	ST747	Seale A Emerg Infect Dis. 2016 Feb;22(2):224-32.
630	8849_2#56	K16544	Kenya	2005	swab	EMM202.1,EMM11.0	EMM11.0	E6	ST250	Seale A Emerg Infect Dis. 2016 Feb;22(2):224-32.
631	8849_2#57	K22338	Kenya	2006	swab	STG866.1,EMM166.1	STG866.1	NT	ST450	Seale A Emerg Infect Dis. 2016 Feb;22(2):224-32.
632	8849_2#58	K22633	Kenya	2007	swab	EMM89.8,	EMM89.8	E4	ST772	Seale A Emerg Infect Dis. 2016 Feb;22(2):224-32.
633	8849_2#59	K22757	Kenya	2007	swab	EMM83.12,EMM205.0	EMM83.12	D4	ST393	Seale A Emerg Infect Dis. 2016 Feb;22(2):224-32.
634	8849_2#6	K23799	Kenya	2007	swab	EMM124.2,	EMM124.2	E4	ST280	Seale A Emerg Infect Dis. 2016 Feb;22(2):224-32.
635	8849_2#60	K22813	Kenya	2007	swab	EMM121.0,	EMM121.0	D4	ST262	Seale A Emerg Infect Dis. 2016 Feb;22(2):224-32.
636	8849_2#61	K23180	Kenya	2007	swab	EMM44.0,	EMM44.0	E3	ST178	Seale A Emerg Infect Dis. 2016 Feb;22(2):224-32.
637	8849_2#62	K23323	Kenya	2007	swab	EMM84.1,	EMM84.1	E4	ST259	Seale A Emerg Infect Dis. 2016 Feb;22(2):224-32.
638	8849_2#63	K21710	Kenya	2007	swab	EMM109.1,	EMM109.1	E4	ST718	Seale A Emerg Infect Dis. 2016 Feb;22(2):224-32.
639	8849_2#64	K19083	Kenya	2006	swab	EMM56.0,EMM205.0	EMM56.0	D4	ST115	Seale A Emerg Infect Dis. 2016 Feb;22(2):224-32.
640	8849_2#65	K49882	Kenya	2011	swab	EMM111.2,	EMM111.2	M111	ST737	Seale A Emerg Infect Dis. 2016 Feb;22(2):224-32.
641	8849_2#66	K5698	Kenya	2000	swab	EMM109.1,	EMM109.1	E4	ST718	Seale A Emerg Infect Dis. 2016 Feb;22(2):224-32.
642	8849_2#67	K49294	Kenya	2011	swab	EMM90.5,	EMM90.5	E2	ST734	Seale A Emerg Infect Dis. 2016 Feb;22(2):224-32.
643	8849_2#68	K49551	Kenya	2011	blood	EMM44.0,	EMM44.0	E3	ST178	Seale A Emerg Infect Dis. 2016 Feb;22(2):224-32.
644	8849_2#71	K38181	Kenya	2009	swab	EMM56.0,EMM205.0	EMM56.0	D4	ST115	Seale A Emerg Infect Dis. 2016 Feb;22(2):224-32.
645	8849_2#72	K25325	Kenya	2007	blood	EMM90.5,	EMM90.5	E2	ST708	Seale A Emerg Infect Dis. 2016 Feb;22(2):224-32.
646	8849_2#73	K40810	Kenya	2010	swab	EMM205.1,EMM93.0	EMM93.0	D4	ST10	Seale A Emerg Infect Dis. 2016 Feb;22(2):224-32.
647	8849_2#74	K41947	Kenya	2010	swab	EMM109.1,	EMM109.1	E4	ST718	Seale A Emerg Infect Dis. 2016 Feb;22(2):224-32.
648	8849_2#75	K23617	Kenya	2007	swab	EMM202.1,EMM48.0	EMM48.0	E6	ST278	Seale A Emerg Infect Dis. 2016 Feb;22(2):224-32.
649	8849_2#77	K6108	Kenya	2000	swab	EMM25.1,EMM159.0	EMM25.1	E3	ST323	Seale A Emerg Infect Dis. 2016 Feb;22(2):224-32.
650	8849_2#78	K3637	Kenya	1998	swab	EMM179.0,	EMM179.0	M179	ST619	Seale A Emerg Infect Dis. 2016 Feb;22(2):224-32.
651	8849_2#79	K4254	Kenya	1999	blood	EMM85.1,	EMM85.1	E6	ST774	Seale A Emerg Infect Dis. 2016 Feb;22(2):224-32.
652	8849_2#8	K40818	Kenya	2010	blood	EMM112.5,	EMM112.5	E4	ST777	Seale A Emerg Infect Dis. 2016 Feb;22(2):224-32.
653	8849_2#85	K6635	Kenya	2000	swab	EMM177.0,EMM164.3	EMM177.0	E6	ST758	Seale A Emerg Infect Dis. 2016 Feb;22(2):224-32.
654	8849_2#86	K12473	Kenya	2004	blood	EMM55.0,	EMM55.0	M55	ST232	Seale A Emerg Infect Dis. 2016 Feb;22(2):224-32.
655	8849_2#88	K5248	Kenya	1999	swab	EMM43.1,	EMM43.1	D4	ST770	Seale A Emerg Infect Dis. 2016 Feb;22(2):224-32.
656	8849_2#89	K16898	Kenya	2005	blood	EMM112.5,	EMM112.5	E4	ST246	Seale A Emerg Infect Dis. 2016 Feb;22(2):224-32.
657	8849_2#9	K37990	Kenya	2009	blood	EMM64.3,EMM138.0	EMM64.3	D4	ST223	Seale A Emerg Infect Dis. 2016 Feb;22(2):224-32.
658	8849_2#91	K7024	Kenya	2001	swab	EMM18.21,EMM167.0	EMM18.21	M18	ST402	Seale A Emerg Infect Dis. 2016 Feb;22(2):224-32.
659	8849_2#92	K7087	Kenya	2001	swab	EMM202.1,EMM11.0	EMM11.0	E6	ST742	Seale A Emerg Infect Dis. 2016 Feb;22(2):224-32.
660	8849_2#93	K7087	Kenya	2001	swab	EMM202.1,EMM11.0	EMM11.0	E6	ST742	Seale A Emerg Infect Dis. 2016 Feb;22(2):224-32.
661	8849_2#94	K7113	Kenya	2001	swab	EMM11.0,EMM202.1	EMM11.0	E6	ST742	Seale A Emerg Infect Dis. 2016 Feb;22(2):224-32.
662	8898_1#12	K37164	Kenya	2009	swab	EMM240.2,EMM224.1	EMM224.1	D4	ST707	Seale A Emerg Infect Dis. 2016 Feb;22(2):224-32.
663	8898_1#14	K38591	Kenya	2009	swab	EMM124.2,	EMM124.2	E4	ST231	Seale A Emerg Infect Dis. 2016 Feb;22(2):224-32.
664	8898_1#17	K41948	Kenya	2010	aspirate	EMM208.0,	EMM208.0	D4	ST719	Seale A Emerg Infect Dis. 2016 Feb;22(2):224-32.
665	8898_1#18	K42600	Kenya	2010	swab	EMM42.3,	EMM42.3	E6	ST721	Seale A Emerg Infect Dis. 2016 Feb;22(2):224-32.
666	8898_1#19	K37164	Kenya	2009	swab	EMM240.2,EMM224.1	EMM224.1	D4	ST707	Seale A Emerg Infect Dis. 2016 Feb;22(2):224-32.
667	8898_1#2	K33937	Kenya	2008	swab	EMM60.7,	EMM60.7	E1	ST700	Seale A Emerg Infect Dis. 2016 Feb;22(2):224-32.
668	8898_1#20	K37287	Kenya	2009	swab	EMM55.0,	EMM55.0	M55	ST248	Seale A Emerg Infect Dis. 2016 Feb;22(2):224-32.
669	8898_1#21	K36294	Kenya	2009	swab	EMM149.0,EMM49.9	EMM49.9	E3	ST705	Seale A Emerg Infect Dis. 2016 Feb;22(2):224-32.
670	8898_1#22	K36347	Kenya	2009	swab	EMM65.0,	EMM65.0	E6	ST716	Seale A Emerg Infect Dis. 2016 Feb;22(2):224-32.
671	8898_1#23	K11464	Kenya	2003	swab	EMM99.5,	EMM99.5	E6	ST781	Seale A Emerg Infect Dis. 2016 Feb;22(2):224-32.
672	8898_1#24	K11814	Kenya	2004	swab	EMM169.1,	EMM169.1	E4	ST226	Seale A Emerg Infect Dis. 2016 Feb;22(2):224-32.
673	8898_1#25	K17716	Kenya	2005	swab	EMM19.10,	EMM19.10	M19	ST769	Seale A Emerg Infect Dis. 2016 Feb;22(2):224-32.
674	8898_1#26	K17300	Kenya	2005	swab	STG866.1,EMM166.1	STG866.1	NT	ST450	Seale A Emerg Infect Dis. 2016 Feb;22(2):224-32.
675	8898_1#27	K19219	Kenya	2006	swab	EMM124.2,	EMM124.2	E4	ST231	Seale A Emerg Infect Dis. 2016 Feb;22(2):224-32.
676	8898_1#28	K50658	Kenya	2011	aspirate	EMM9.0,EMM149.2	EMM9.0	E3	ST740	Seale A Emerg Infect Dis. 2016 Feb;22(2):224-32.
677	8898_1#29	K24601	Kenya	2007	swab	EMM89.8,	EMM89.8	E4	ST772	Seale A Emerg Infect Dis. 2016 Feb;22(2):224-32.
678	8898_1#30	K24635	Kenya	2007	swab	EMM44.0,	EMM44.0	E3	ST178	Seale A Emerg Infect Dis. 2016 Feb;22(2):224-32.
679	8898_1#31	K25713	Kenya	2007	swab	EMM124.2,	EMM124.2	E4	ST280	Seale A Emerg Infect Dis. 2016 Feb;22(2):224-32.
680	8898_1#32	K26504	Kenya	2007	swab	EMM44.0,	EMM44.0	E3	ST178	Seale A Emerg Infect Dis. 2016 Feb;22(2):224-32.
681	8898_1#33	K28162	Kenya	2007	swab	EMM83.12,EMM205.0	EMM83.12	D4	ST393	Seale A Emerg Infect Dis. 2016 Feb;22(2):224-32.
682	8898_1#34	K29166	Kenya	2008	blood	EMM162.1,EMM205.0	EMM162.1	NT	ST412	Seale A Emerg Infect Dis. 2016 Feb;22(2):224-32.
683	8898_1#35	K29527	Kenya	2008	swab	EMM4.5,	EMM4.5	E1	ST771	Seale A Emerg Infect Dis. 2016 Feb;22(2):224-32.
684	8898_1#36	K29655	Kenya	2008	swab	EMM53.4,EMM205.1	EMM53.4	D4	ST460	Seale A Emerg Infect Dis. 2016 Feb;22(2):224-32.
685	8898_1#37	K29743	Kenya	2008	blood	EMM114.5,	EMM114.5	E4	ST220	Seale A Emerg Infect Dis. 2016 Feb;22(2):224-32.
686	8898_1#38	K30067	Kenya	2008	swab	EMM73.0,	EMM73.0	E4	ST469	Seale A Emerg Infect Dis. 2016 Feb;22(2):224-32.
687	8898_1#39	K31063	Kenya	2008	blood	EMM209.0,	EMM209.0	E3	ST260	Seale A Emerg Infect Dis. 2016 Feb;22(2):224-32.
688	8898_1#4	K33937	Kenya	2008	swab	EMM60.7,	EMM60.7	E1	ST700	Seale A Emerg Infect Dis. 2016 Feb;22(2):224-32.
689	8898_1#40	K31539	Kenya	2008	blood	EMM238.1,EMM226.0	EMM238.1	A-C3	ST713	Seale A Emerg Infect Dis. 2016 Feb;22(2):224-32.
690	8898_1#41	K31611	Kenya	2008	swab	EMM93.6,	EMM93.6	D4	ST613	Seale A Emerg Infect Dis. 2016 Feb;22(2):224-32.
691	8898_1#42	K32502	Kenya	2008	swab	EMM165.0,	EMM165.0	E1	ST768	Seale A Emerg Infect Dis. 2016 Feb;22(2):224-32.
692	8898_1#43	K33560	Kenya	2008	CSF	EMM179.0,	EMM179.0	M179	ST619	Seale A Emerg Infect Dis. 2016 Feb;22(2):224-32.
693	8898_1#44	K33560	Kenya	2008	CSF	EMM179.0,	EMM179.0	M179	ST619	Seale A Emerg Infect Dis. 2016 Feb;22(2):224-32.
694	8898_1#45	K20641	Kenya	2006	swab	EMM80.0,EMM205.1	EMM80.0	D4	ST701	Seale A Emerg Infect Dis. 2016 Feb;22(2):224-32.
695	8898_1#46	K20653	Kenya	2007	swab	EMM209.0,	EMM209.0	E3	ST260	Seale A Emerg Infect Dis. 2016 Feb;22(2):224-32.
696	8898_1#48	K20746	Kenya	2007	swab	EMM97.1,	EMM97.1	D5	ST283	Seale A Emerg Infect Dis. 2016 Feb;22(2):224-32.
697	8898_1#49	K20747	Kenya	2007	swab	EMM84.1,	EMM84.1	E4	ST259	Seale A Emerg Infect Dis. 2016 Feb;22(2):224-32.
698	8898_1#5	K33951	Kenya	2008	swab	EMM80.0,EMM205.1	EMM80.0	D4	ST701	Seale A Emerg Infect Dis. 2016 Feb;22(2):224-32.
699	8898_1#50	K20882	Kenya	2007	swab	EMM209.0,	EMM209.0	E3	ST260	Seale A Emerg Infect Dis. 2016 Feb;22(2):224-32.
700	8898_1#51	K20910	Kenya	2007	swab	EMM9.0,	EMM9.0	E3	ST447	Seale A Emerg Infect Dis. 2016 Feb;22(2):224-32.
701	8898_1#52	K21246	Kenya	2007	swab	EMM77.0,	EMM77.0	E4	ST747	Seale A Emerg Infect Dis. 2016 Feb;22(2):224-32.
702	8898_1#53	K10332	Kenya	2003	swab	EMM183.2,EMM149.0	EMM183.2	E3	ST761	Seale A Emerg Infect Dis. 2016 Feb;22(2):224-32.
703	8898_1#54	K10474	Kenya	2003	swab	EMM118.2,	EMM118.2	E3	ST752	Seale A Emerg Infect Dis. 2016 Feb;22(2):224-32.
704	8898_1#55	K10586	Kenya	2003	swab	EMM50.3,	EMM50.3	E2	ST217	Seale A Emerg Infect Dis. 2016 Feb;22(2):224-32.
705	8898_1#56	K10722	Kenya	2003	swab	EMM22.5,	EMM22.5	E4	ST213	Seale A Emerg Infect Dis. 2016 Feb;22(2):224-32.
706	8898_1#57	K11116	Kenya	2003	swab	EMM18.21,EMM167.0	EMM18.21	M18	ST402	Seale A Emerg Infect Dis. 2016 Feb;22(2):224-32.
707	8898_1#58	K11239	Kenya	2003	swab	EMM169.1,	EMM169.1	E4	ST238	Seale A Emerg Infect Dis. 2016 Feb;22(2):224-32.
708	8898_1#59	K11243	Kenya	2003	swab	EMM114.5,	EMM114.5	E4	ST220	Seale A Emerg Infect Dis. 2016 Feb;22(2):224-32.
709	8898_1#6	K33983	Kenya	2008	swab	EMM30.15,EMM174.1	EMM30.15	A-C2	ST537	Seale A Emerg Infect Dis. 2016 Feb;22(2):224-32.
710	8898_1#60	K11319	Kenya	2003	swab	EMM64.3,EMM138.0	EMM64.3	D4	ST223	Seale A Emerg Infect Dis. 2016 Feb;22(2):224-32.
711	8898_1#61	K13065	Kenya	2004	swab	EMM170.0,EMM75.1	EMM75.1	E6	ST578	Seale A Emerg Infect Dis. 2016 Feb;22(2):224-32.
712	8898_1#62	K13107	Kenya	2004	swab	EMM183.2,EMM149.0	EMM183.2	E3	ST219	Seale A Emerg Infect Dis. 2016 Feb;22(2):224-32.
713	8898_1#63	K13190	Kenya	2004	swab	EMM39.4,EMM137.0	EMM39.4	A-C4	ST236	Seale A Emerg Infect Dis. 2016 Feb;22(2):224-32.
714	8898_1#64	K13372	Kenya	2004	swab	EMM81.2,	EMM81.2	E6	ST766	Seale A Emerg Infect Dis. 2016 Feb;22(2):224-32.
715	8898_1#66	K17276	Kenya	2005	swab	EMM92.0,	EMM92.0	E2	ST674	Seale A Emerg Infect Dis. 2016 Feb;22(2):224-32.
716	8898_1#67	K23685	Kenya	2007	swab	EMM79.5,	EMM79.5	E3	ST714	Seale A Emerg Infect Dis. 2016 Feb;22(2):224-32.
717	8898_1#68	K23745	Kenya	2007	swab	EMM60.7,	EMM60.7	E1	ST279	Seale A Emerg Infect Dis. 2016 Feb;22(2):224-32.
718	8898_1#69	K23866	Kenya	2007	swab	EMM82.5,EMM236.1	EMM82.5	E3	ST257	Seale A Emerg Infect Dis. 2016 Feb;22(2):224-32.
719	8898_1#7	K35870	Kenya	2008	swab	EMM229.0,	EMM229.0	A-C4	ST703	Seale A Emerg Infect Dis. 2016 Feb;22(2):224-32.
720	8898_1#70	K23890	Kenya	2007	swab	EMM97.1,	EMM97.1	D5	ST283	Seale A Emerg Infect Dis. 2016 Feb;22(2):224-32.
721	8898_1#71	K24146	Kenya	2007	swab	EMM165.0,	EMM165.0	E1	ST768	Seale A Emerg Infect Dis. 2016 Feb;22(2):224-32.
722	8898_1#72	K24190	Kenya	2007	swab	EMM28.0,EMM149.2	EMM28.0	E4	ST763	Seale A Emerg Infect Dis. 2016 Feb;22(2):224-32.
723	8898_1#74	K24525	Kenya	2007	swab	EMM11.0,EMM202.1	EMM11.0	E6	ST293~	Seale A Emerg Infect Dis. 2016 Feb;22(2):224-32.
724	8898_1#76	K19347	Kenya	2006	swab	STG1750.0,EMM166.1	stg1750.0	NT	ST258	Seale A Emerg Infect Dis. 2016 Feb;22(2):224-32.
725	8898_1#78	K19376	Kenya	2006	swab	EMM75.1,EMM170.0	EMM75.1	E6	ST578	Seale A Emerg Infect Dis. 2016 Feb;22(2):224-32.
726	8898_1#79	K19669	Kenya	2006	swab	STG1750.0,EMM166.1	stg1750.0	NT	ST258	Seale A Emerg Infect Dis. 2016 Feb;22(2):224-32.
727	8898_1#8	K35909	Kenya	2009	swab	EMM170.0,EMM75.1	EMM75.1	E6	ST704	Seale A Emerg Infect Dis. 2016 Feb;22(2):224-32.
728	8898_1#80	K50593	Kenya	2011	blood	EMM9.0,EMM149.2	EMM9.0	E3	ST740	Seale A Emerg Infect Dis. 2016 Feb;22(2):224-32.
729	8898_1#81	K19875	Kenya	2006	swab	EMM111.2,	EMM111.2	M111	ST256	Seale A Emerg Infect Dis. 2016 Feb;22(2):224-32.
730	8898_1#82	K19912	Kenya	2006	swab	EMM92.0,	EMM92.0	E2	ST674	Seale A Emerg Infect Dis. 2016 Feb;22(2):224-32.
731	8898_1#83	K19952	Kenya	2006	swab	EMM92.0,	EMM92.0	E2	ST674	Seale A Emerg Infect Dis. 2016 Feb;22(2):224-32.
732	8898_1#84	K19952	Kenya	2006	swab	EMM92.0,	EMM92.0	E2	ST674	Seale A Emerg Infect Dis. 2016 Feb;22(2):224-32.
733	8898_1#85	K20201	Kenya	2006	swab	EMM44.0,	EMM44.0	E3	ST178	Seale A Emerg Infect Dis. 2016 Feb;22(2):224-32.
734	8898_1#87	K36395	Kenya	2009	swab	EMM81.2,	EMM81.2	E6	ST766	Seale A Emerg Infect Dis. 2016 Feb;22(2):224-32.
735	8898_1#89	K35215	Kenya	2008	swab	STG866.1,EMM166.1	STG866.1	NT	ST450	Seale A Emerg Infect Dis. 2016 Feb;22(2):224-32.
736	8898_1#9	K36067	Kenya	2009	aspirate	EMM85.1,	EMM85.1	E6	ST774	Seale A Emerg Infect Dis. 2016 Feb;22(2):224-32.
737	8898_1#90	K50105	Kenya	2011	swab	EMM22.5,	EMM22.5	E4	ST213	Seale A Emerg Infect Dis. 2016 Feb;22(2):224-32.
738	8898_1#91	K31028	Kenya	2008	swab	EMM93.6,	EMM93.6	D4	ST583	Seale A Emerg Infect Dis. 2016 Feb;22(2):224-32.
739	8898_1#92	K35129	Kenya	2008	swab	STG1750.0,EMM166.1	stg1750.0	NT	ST258	Seale A Emerg Infect Dis. 2016 Feb;22(2):224-32.
740	8898_1#93	K27345	Kenya	2007	swab	STG866.1,EMM166.1	STG866.1	NT	ST450	Seale A Emerg Infect Dis. 2016 Feb;22(2):224-32.
741	8898_1#94	K28044	Kenya	2007	blood	EMM25.1,EMM159.0	EMM25.1	E3	ST323	Seale A Emerg Infect Dis. 2016 Feb;22(2):224-32.
742	8898_1#95	K19417	Kenya	2006	swab	EMM122.0,	EMM122.0	M122	ST200	Seale A Emerg Infect Dis. 2016 Feb;22(2):224-32.
743	8898_1#96	K50316	Kenya	2011	swab	EMM64.3,EMM138.0	EMM64.3	D4	ST223	Seale A Emerg Infect Dis. 2016 Feb;22(2):224-32.
744	8898_2#10	K7541	Kenya	2001	swab	EMM81.2,	EMM81.2	E6	ST766	Seale A Emerg Infect Dis. 2016 Feb;22(2):224-32.
745	8898_2#13	K7114	Kenya	2001	swab	STG866.1,EMM166.1	STG866.1	NT	ST450	Seale A Emerg Infect Dis. 2016 Feb;22(2):224-32.
746	8898_2#15	K7151	Kenya	2001	swab	EMM183.2,EMM149.0	EMM183.2	E3	ST761	Seale A Emerg Infect Dis. 2016 Feb;22(2):224-32.
747	8898_2#19	K8955	Kenya	2002	swab	EMM65.0,	EMM65.0	E6	ST778	Seale A Emerg Infect Dis. 2016 Feb;22(2):224-32.
748	8898_2#2	K7928	Kenya	2001	swab	EMM4.5,	EMM4.5	E1	ST771	Seale A Emerg Infect Dis. 2016 Feb;22(2):224-32.
749	8898_2#21	K9333	Kenya	2002	swab	EMM90.5,	EMM90.5	E2	ST708	Seale A Emerg Infect Dis. 2016 Feb;22(2):224-32.
750	8898_2#23	K10016	Kenya	2003	swab	EMM103.0,	EMM103.0	E3	ST233	Seale A Emerg Infect Dis. 2016 Feb;22(2):224-32.
751	8898_2#24	K10021	Kenya	2003	swab	EMM103.0,	EMM103.0	E3	ST233	Seale A Emerg Infect Dis. 2016 Feb;22(2):224-32.
752	8898_2#28	K9408	Kenya	2002	swab	EMM65.0,	EMM65.0	E6	ST778	Seale A Emerg Infect Dis. 2016 Feb;22(2):224-32.
753	8898_2#29	K10040	Kenya	2003	swab	EMM22.5,	EMM22.5	E4	ST213	Seale A Emerg Infect Dis. 2016 Feb;22(2):224-32.
754	8898_2#3	K7829	Kenya	2001	swab	EMM186.1,EMM138.0	EMM186.1	D4	ST262	Seale A Emerg Infect Dis. 2016 Feb;22(2):224-32.
755	8898_2#30	K10105	Kenya	2003	swab	EMM22.5,	EMM22.5	E4	ST213	Seale A Emerg Infect Dis. 2016 Feb;22(2):224-32.
756	8898_2#31	K10712	Kenya	2003	blood	EMM183.2,EMM149.0	EMM183.2	E3	ST219	Seale A Emerg Infect Dis. 2016 Feb;22(2):224-32.
757	8898_2#32	K5086	Kenya	1999	blood	EMM238.1,EMM226.0	EMM238.1	A-C3	ST713	Seale A Emerg Infect Dis. 2016 Feb;22(2):224-32.
758	8898_2#34	K10987	Kenya	2003	blood	EMM230.1,	EMM230.1	D4	ST755	Seale A Emerg Infect Dis. 2016 Feb;22(2):224-32.
759	8898_2#35	K10238	Kenya	2003	blood	EMM218.1,	EMM218.1	M218	ST292	Seale A Emerg Infect Dis. 2016 Feb;22(2):224-32.
760	8898_2#36	K9440	Kenya	2002	blood	EMM99.5,	EMM99.5	E6	ST779	Seale A Emerg Infect Dis. 2016 Feb;22(2):224-32.
761	8898_2#37	K19639	Kenya	2006	blood	EMM111.1,	EMM111.1	M111	ST496	Seale A Emerg Infect Dis. 2016 Feb;22(2):224-32.
762	8898_2#38	K17494	Kenya	2005	blood	EMM55.0,	EMM55.0	M55	ST248	Seale A Emerg Infect Dis. 2016 Feb;22(2):224-32.
763	8898_2#39	K4973	Kenya	1999	blood	EMM25.4,	EMM25.4	E3	ST735	Seale A Emerg Infect Dis. 2016 Feb;22(2):224-32.
764	8898_2#4	K7908	Kenya	2001	swab	EMM65.4,	EMM65.4	E6	ST129~	Seale A Emerg Infect Dis. 2016 Feb;22(2):224-32.
765	8898_2#40	K7175	Kenya	2001	blood	EMM165.0,	EMM165.0	E1	ST762	Seale A Emerg Infect Dis. 2016 Feb;22(2):224-32.
766	8898_2#45	K18724	Kenya	2006	blood	EMM11.0,EMM202.1	EMM11.0	E6	ST250	Seale A Emerg Infect Dis. 2016 Feb;22(2):224-32.
767	8898_2#46	K7554	Kenya	2001	blood	EMM90.5,	EMM90.5	E2	ST708	Seale A Emerg Infect Dis. 2016 Feb;22(2):224-32.
768	8898_2#47	K10697	Kenya	2003	blood	EMM18.21,EMM167.0	EMM18.21	M18	ST221	Seale A Emerg Infect Dis. 2016 Feb;22(2):224-32.
769	8898_2#48	K5192	Kenya	1999	blood	EMM147.0,	EMM147.0	NT	ST741	Seale A Emerg Infect Dis. 2016 Feb;22(2):224-32.
770	8898_2#49	K4761	Kenya	1999	blood	EMM8.3,	EMM8.3	E4	ST730	Seale A Emerg Infect Dis. 2016 Feb;22(2):224-32.
771	8898_2#51	K16772	Kenya	2005	blood	EMM89.8,	EMM89.8	E4	ST245	Seale A Emerg Infect Dis. 2016 Feb;22(2):224-32.
772	8898_2#52	K5017	Kenya	1999	blood	EMM44.0,	EMM44.0	E3	ST178	Seale A Emerg Infect Dis. 2016 Feb;22(2):224-32.
773	8898_2#53	K3573	Kenya	1998	blood	EMM116.2,	EMM116.2	D4	ST702	Seale A Emerg Infect Dis. 2016 Feb;22(2):224-32.
774	8898_2#54	K16738	Kenya	2005	blood	EMM64.3,EMM138.0	EMM64.3	D4	ST223	Seale A Emerg Infect Dis. 2016 Feb;22(2):224-32.
775	8898_2#55	K7559	Kenya	2001	blood	EMM110.0,	EMM110.0	E2	ST767	Seale A Emerg Infect Dis. 2016 Feb;22(2):224-32.
776	8898_2#56	K3525	Kenya	1998	blood	EMM55.0,	EMM55.0	M55	ST100	Seale A Emerg Infect Dis. 2016 Feb;22(2):224-32.
777	8898_2#59	K3879	Kenya	1998	blood	EMM183.2,EMM149.0	EMM183.2	E3	ST714	Seale A Emerg Infect Dis. 2016 Feb;22(2):224-32.
778	8898_2#60	K19873	Kenya	2006	CSF	EMM78.5,	EMM78.5	E1	ST255	Seale A Emerg Infect Dis. 2016 Feb;22(2):224-32.
779	8898_2#61	K17786	Kenya	2006	blood	EMM202.1,EMM11.0	EMM11.0	E6	ST250	Seale A Emerg Infect Dis. 2016 Feb;22(2):224-32.
780	8898_2#62	K4973	Kenya	1999	blood	EMM25.4,	EMM25.4	E3	ST735	Seale A Emerg Infect Dis. 2016 Feb;22(2):224-32.
781	8898_2#65	K8861	Kenya	2002	blood	EMM44.0,	EMM44.0	E3	ST178	Seale A Emerg Infect Dis. 2016 Feb;22(2):224-32.
782	8898_2#66	K13045	Kenya	2004	blood	EMM138.0,EMM192.0	EMM192.0	D4	ST261	Seale A Emerg Infect Dis. 2016 Feb;22(2):224-32.
783	8898_2#67	K12183	Kenya	2004	blood	EMM124.2,	EMM124.2	E4	ST231	Seale A Emerg Infect Dis. 2016 Feb;22(2):224-32.
784	8898_2#7	K7736	Kenya	2001	swab	EMM165.0,	EMM165.0	E1	ST768	Seale A Emerg Infect Dis. 2016 Feb;22(2):224-32.
785	8898_2#70	K37914	Kenya	2009	urine	EMM119.2,EMM138.0	EMM119.2	D4	ST239	Seale A Emerg Infect Dis. 2016 Feb;22(2):224-32.
786	8898_2#71	K4728	Kenya	1999	blood	EMM44.0,	EMM44.0	E3	ST178	Seale A Emerg Infect Dis. 2016 Feb;22(2):224-32.
787	8898_2#73	K9679	Kenya	2002	blood	EMM112.5,	EMM112.5	E4	ST777	Seale A Emerg Infect Dis. 2016 Feb;22(2):224-32.
788	8898_2#74	K17786	Kenya	2006	blood	EMM11.0,EMM202.1	EMM11.0	E6	ST251	Seale A Emerg Infect Dis. 2016 Feb;22(2):224-32.
789	8898_2#75	K3730	Kenya	1998	blood	EMM90.5,	EMM90.5	E2	ST708	Seale A Emerg Infect Dis. 2016 Feb;22(2):224-32.
790	8898_2#76	K10378	Kenya	2003	blood	EMM50.3,	EMM50.3	E2	ST217	Seale A Emerg Infect Dis. 2016 Feb;22(2):224-32.
791	8898_2#77	K8460	Kenya	2002	blood	EMM82.5,EMM236.1	EMM82.5	E3	ST257	Seale A Emerg Infect Dis. 2016 Feb;22(2):224-32.
792	8898_2#78	K12669	Kenya	2004	blood	EMM183.2,EMM149.0	EMM183.2	E3	ST234	Seale A Emerg Infect Dis. 2016 Feb;22(2):224-32.
793	8898_2#79	K5851	Kenya	2000	blood	EMM230.1,	EMM230.1	D4	ST755	Seale A Emerg Infect Dis. 2016 Feb;22(2):224-32.
794	8898_2#8	K7792	Kenya	2001	swab	EMM43.1,	EMM43.1	D4	ST770	Seale A Emerg Infect Dis. 2016 Feb;22(2):224-32.
795	8898_2#82	K9454	Kenya	2002	blood	EMM50.3,	EMM50.3	E2	ST217	Seale A Emerg Infect Dis. 2016 Feb;22(2):224-32.
796	8898_2#83	K9612	Kenya	2002	blood	EMM99.5,	EMM99.5	E6	ST781	Seale A Emerg Infect Dis. 2016 Feb;22(2):224-32.
797	8898_3#12	K21633	Kenya	2007	blood	EMM15.1,	EMM15.1	E3	ST266	Seale A Emerg Infect Dis. 2016 Feb;22(2):224-32.
798	8898_3#14	K7219	Kenya	2001	blood	EMM28.0,EMM149.2	EMM28.0	E4	ST763	Seale A Emerg Infect Dis. 2016 Feb;22(2):224-32.
799	8898_3#17	K10676	Kenya	2003	blood	EMM103.0,	EMM103.0	E3	ST233	Seale A Emerg Infect Dis. 2016 Feb;22(2):224-32.
800	8898_3#19	K10167	Kenya	2003	blood	EMM98.3,EMM205.0	EMM98.3	D4	ST136	Seale A Emerg Infect Dis. 2016 Feb;22(2):224-32.
801	8898_3#2	K8015	Kenya	2001	swab	EMM99.5,	EMM99.5	M95	ST781	Seale A Emerg Infect Dis. 2016 Feb;22(2):224-32.
802	8898_3#20	K9521	Kenya	2002	blood	EMM84.1,	EMM84.1	E4	ST780	Seale A Emerg Infect Dis. 2016 Feb;22(2):224-32.
803	8898_3#21	K5679	Kenya	2000	blood	EMM177.0,EMM164.3	EMM177.0	E6	ST743	Seale A Emerg Infect Dis. 2016 Feb;22(2):224-32.
804	8898_3#23	K7393	Kenya	2001	blood	EMM63.5,	EMM63.5	E6	ST764	Seale A Emerg Infect Dis. 2016 Feb;22(2):224-32.
805	8898_3#24	K6222	Kenya	2000	blood	EMM70.0,EMM205.0	EMM70.0	D4	ST754	Seale A Emerg Infect Dis. 2016 Feb;22(2):224-32.
806	8898_3#25	K17097	Kenya	2005	blood	EMM138.0,EMM223.0	EMM223.0	D4	ST536	Seale A Emerg Infect Dis. 2016 Feb;22(2):224-32.
807	8898_3#26	K9215	Kenya	2002	blood	EMM112.5,	EMM112.5	E4	ST777	Seale A Emerg Infect Dis. 2016 Feb;22(2):224-32.
808	8898_3#29	K12554	Kenya	2004	blood	EMM44.0,	EMM44.0	E3	ST178	Seale A Emerg Infect Dis. 2016 Feb;22(2):224-32.
809	8898_3#3	K13484	Kenya	2004	blood	EMM138.0,EMM119.2	EMM119.2	D4	ST239	Seale A Emerg Infect Dis. 2016 Feb;22(2):224-32.
810	8898_3#30	K3944	Kenya	1998	blood	EMM122.0,	EMM122.0	M122	ST200	Seale A Emerg Infect Dis. 2016 Feb;22(2):224-32.
811	8898_3#31	K10311	Kenya	2003	blood	EMM50.3,	EMM50.3	E2	ST217	Seale A Emerg Infect Dis. 2016 Feb;22(2):224-32.
812	8898_3#32	K10812	Kenya	2003	blood	EMM82.5,EMM236.1	EMM82.5	E4	ST257	Seale A Emerg Infect Dis. 2016 Feb;22(2):224-32.
813	8898_3#33	K7846	Kenya	2001	blood	EMM74.0,EMM156.0	EMM74.0	M74	ST120	Seale A Emerg Infect Dis. 2016 Feb;22(2):224-32.
814	8898_3#34	K3589	Kenya	1998	blood	EMM8.3,	EMM8.3	E4	ST241	Seale A Emerg Infect Dis. 2016 Feb;22(2):224-32.
815	8898_3#35	K8543	Kenya	2002	blood	EMM85.1,	EMM85.1	E6	ST774	Seale A Emerg Infect Dis. 2016 Feb;22(2):224-32.
816	8898_3#36	K9612	Kenya	2002	blood	EMM99.5,	EMM99.5	E6	ST781	Seale A Emerg Infect Dis. 2016 Feb;22(2):224-32.
817	8898_3#37	K8057	Kenya	2001	blood	EMM179.0,	EMM179.0	M179	ST619	Seale A Emerg Infect Dis. 2016 Feb;22(2):224-32.
818	8898_3#38	K11254	Kenya	2003	blood	EMM18.21,EMM167.0	EMM18.21	M18	ST221	Seale A Emerg Infect Dis. 2016 Feb;22(2):224-32.
819	8898_3#39	K11271	Kenya	2003	blood	EMM25.4,	EMM25.4	E3	ST222	Seale A Emerg Infect Dis. 2016 Feb;22(2):224-32.
820	8898_3#4	K9037	Kenya	2002	blood	EMM239.1,EMM166.1	EMM239.1	A-C3	ST776	Seale A Emerg Infect Dis. 2016 Feb;22(2):224-32.
821	8898_3#41	K4350	Kenya	1999	blood	EMM22.5,	EMM22.5	E4	ST213	Seale A Emerg Infect Dis. 2016 Feb;22(2):224-32.
822	8898_3#42	K7736	Kenya	2001	swab	EMM19.10,	EMM19.10	M19	ST769	Seale A Emerg Infect Dis. 2016 Feb;22(2):224-32.
823	8898_3#45	K7731	Kenya	2001	blood	EMM100.2,EMM174.1	EMM100.2	D2	ST773	Seale A Emerg Infect Dis. 2016 Feb;22(2):224-32.
824	8898_3#46	K14810	Kenya	2005	blood	EMM18.21,EMM167.0,EMM167.0	EMM18.21	M18	ST402	Seale A Emerg Infect Dis. 2016 Feb;22(2):224-32.
825	8898_3#48	K10213	Kenya	2003	swab	EMM169.1,	EMM169.1	E4	ST238	Seale A Emerg Infect Dis. 2016 Feb;22(2):224-32.
826	8898_3#49	K3808	Kenya	1998	swab	EMM95.0,EMM205.0	EMM95.0	M95	ST712	Seale A Emerg Infect Dis. 2016 Feb;22(2):224-32.
827	8898_3#5	K20001	Kenya	2006	blood	EMM77.0,EMM149.2	EMM77.0	E4	ST747	Seale A Emerg Infect Dis. 2016 Feb;22(2):224-32.
828	8898_3#50	K3828	Kenya	1998	swab	EMM238.1,EMM226.0	EMM238.1	A-C3	ST713	Seale A Emerg Infect Dis. 2016 Feb;22(2):224-32.
829	8898_3#51	K3964	Kenya	1999	swab	EMM65.0,	EMM65.0	E6	ST716	Seale A Emerg Infect Dis. 2016 Feb;22(2):224-32.
830	8898_3#52	K3997	Kenya	1999	swab	EMM65.0,	EMM65.0	E6	ST716	Seale A Emerg Infect Dis. 2016 Feb;22(2):224-32.
831	8898_3#53	K4134	Kenya	1999	blood	EMM209.1,	EMM209.1	E3	ST717	Seale A Emerg Infect Dis. 2016 Feb;22(2):224-32.
832	8898_3#54	K4240	Kenya	1999	swab	EMM74.0,EMM156.0	EMM74.0	M74	ST720	Seale A Emerg Infect Dis. 2016 Feb;22(2):224-32.
833	8898_3#55	K4263	Kenya	1999	swab	EMM230.1,	EMM230.1	D4	ST755	Seale A Emerg Infect Dis. 2016 Feb;22(2):224-32.
834	8898_3#56	K4656	Kenya	1999	swab	EMM92.1,	EMM92.1	E2	ST727	Seale A Emerg Infect Dis. 2016 Feb;22(2):224-32.
835	8898_3#57	K4819	Kenya	1999	swab	EMM230.1,	EMM230.1	D4	ST755	Seale A Emerg Infect Dis. 2016 Feb;22(2):224-32.
836	8898_3#58	K4982	Kenya	1999	swab	EMM124.2,	EMM124.2	E4	ST736	Seale A Emerg Infect Dis. 2016 Feb;22(2):224-32.
837	8898_3#59	K5460	Kenya	2000	swab	EMM11.0,EMM202.1	EMM11.0	E6	ST742	Seale A Emerg Infect Dis. 2016 Feb;22(2):224-32.
838	8898_3#6	K8396	Kenya	2002	blood	EMM89.8,	EMM89.8	E4	ST772	Seale A Emerg Infect Dis. 2016 Feb;22(2):224-32.
839	8898_3#61	K13389	Kenya	2004	blood	EMM169.1,	EMM169.1	E4	ST238	Seale A Emerg Infect Dis. 2016 Feb;22(2):224-32.
840	8898_3#62	K5660	Kenya	2000	swab	STG866.1,EMM166.1	STG866.1	NT	ST450~	Seale A Emerg Infect Dis. 2016 Feb;22(2):224-32.
841	8898_3#63	K5690	Kenya	2000	swab	EMM81.11,	EMM81.11	E6	ST744	Seale A Emerg Infect Dis. 2016 Feb;22(2):224-32.
842	8898_3#64	K5727	Kenya	2000	swab	EMM25.1,EMM159.0	EMM25.1	E3	ST746	Seale A Emerg Infect Dis. 2016 Feb;22(2):224-32.
843	8898_3#65	K8492	Kenya	2002	swab	EMM100.2,EMM174.1	EMM100.2	D2	ST773	Seale A Emerg Infect Dis. 2016 Feb;22(2):224-32.
844	8898_3#66	K8744	Kenya	2002	swab	EMM8.3,	EMM8.3	E4	ST241	Seale A Emerg Infect Dis. 2016 Feb;22(2):224-32.
845	8898_3#67	K5797	Kenya	2000	swab	EMM77.0,EMM149.2	EMM77.0	E4	ST747	Seale A Emerg Infect Dis. 2016 Feb;22(2):224-32.
846	8898_3#68	K5898	Kenya	2000	swab	EMM209.1,	EMM209.1	E3	ST749	Seale A Emerg Infect Dis. 2016 Feb;22(2):224-32.
847	8898_3#69	K5910	Kenya	2000	swab	EMM92.1,	EMM92.1	E2	ST750	Seale A Emerg Infect Dis. 2016 Feb;22(2):224-32.
848	8898_3#70	K5965	Kenya	2000	swab	EMM147.0,	EMM147.0	NT	ST753	Seale A Emerg Infect Dis. 2016 Feb;22(2):224-32.
849	8898_3#71	K6008	Kenya	2000	swab	EMM75.1,EMM170.0	EMM75.1	E6	ST751	Seale A Emerg Infect Dis. 2016 Feb;22(2):224-32.
850	8898_3#72	K6038	Kenya	2000	swab	EMM118.2,	EMM118.2	E3	ST752	Seale A Emerg Infect Dis. 2016 Feb;22(2):224-32.
851	8898_3#73	K6048	Kenya	2000	swab	EMM147.0,	EMM147.0	NT	ST753	Seale A Emerg Infect Dis. 2016 Feb;22(2):224-32.
852	8898_3#74	K6085	Kenya	2000	swab	EMM8.3,	EMM8.3	E4	ST241	Seale A Emerg Infect Dis. 2016 Feb;22(2):224-32.
853	8898_3#75	K6099	Kenya	2000	swab	EMM77.0,EMM149.2	EMM77.0	E4	ST482	Seale A Emerg Infect Dis. 2016 Feb;22(2):224-32.
854	8898_3#77	K6363	Kenya	2000	swab	EMM230.1,	EMM230.1	D4	ST755	Seale A Emerg Infect Dis. 2016 Feb;22(2):224-32.
855	8898_3#78	K6428	Kenya	2000	swab	EMM97.1,	EMM97.1	D5	ST756	Seale A Emerg Infect Dis. 2016 Feb;22(2):224-32.
856	8898_3#8	K7498	Kenya	2001	blood	EMM44.0,	EMM44.0	E3	ST178	Seale A Emerg Infect Dis. 2016 Feb;22(2):224-32.
857	8898_3#82	K6917	Kenya	2001	swab	EMM65.5,	EMM65.5	E6	ST215	Seale A Emerg Infect Dis. 2016 Feb;22(2):224-32.
858	8898_3#83	K4828	Kenya	1999	blood	EMM179.0,	EMM179.0	M179	ST619	Seale A Emerg Infect Dis. 2016 Feb;22(2):224-32.
859	8898_3#84	K8728	Kenya	2002	blood	EMM64.3,EMM138.0	EMM64.3	D4	ST223	Seale A Emerg Infect Dis. 2016 Feb;22(2):224-32.
860	8898_3#85	K13179	Kenya	2004	blood	STG7882.3,	STG7882.3	NT	ST235	Seale A Emerg Infect Dis. 2016 Feb;22(2):224-32.
861	8898_3#87	K12537	Kenya	2004	CSF	EMM103.0,	EMM103.0	E3	ST233	Seale A Emerg Infect Dis. 2016 Feb;22(2):224-32.
862	8898_3#89	K23182	Kenya	2007	blood	EMM63.5,EMM170.0	EMM63.5	E6	ST274	Seale A Emerg Infect Dis. 2016 Feb;22(2):224-32.
863	8898_3#9	K19961	Kenya	2006	blood	EMM82.5,EMM236.1	EMM82.5	E3	ST257	Seale A Emerg Infect Dis. 2016 Feb;22(2):224-32.
864	8898_3#90	K5017	Kenya	1999	blood	EMM44.0,	EMM44.0	E3	ST178	Seale A Emerg Infect Dis. 2016 Feb;22(2):224-32.
865	8898_3#91	K10514	Kenya	2003	blood	EMM77.0,EMM149.2	EMM77.0	E4	ST218	Seale A Emerg Infect Dis. 2016 Feb;22(2):224-32.
866	8898_3#92	K12614	Kenya	2004	blood	EMM179.0,	EMM179.0	M179	ST619	Seale A Emerg Infect Dis. 2016 Feb;22(2):224-32.
867	8898_3#93	K9361	Kenya	2002	blood	EMM44.0,	EMM44.0	E3	ST178	Seale A Emerg Infect Dis. 2016 Feb;22(2):224-32.
868	8898_3#94	K13389	Kenya	2004	blood	EMM169.1,	EMM169.1	E4	ST238	Seale A Emerg Infect Dis. 2016 Feb;22(2):224-32.
869	8898_3#95	K9189	Kenya	2002	blood	EMM182.1,	EMM182.1	E6	ST229	Seale A Emerg Infect Dis. 2016 Feb;22(2):224-32.
870	8898_3#96	K6613	Kenya	2000	blood	EMM218.1,	EMM218.1	M218	ST292	Seale A Emerg Infect Dis. 2016 Feb;22(2):224-32.
871	SP10LAU	Draft	Lebanon			EMM118.0,EMM236.1	EMM118.0	E3	ST167	Tokajian S Genome Announc. 2014 May 15;2(3). pii: e00358-14.
872	SP1LAU	Draft	Lebanon			EMM12.0,	EMM12.0	A-C4	ST36	Tokajian S Genome Announc. 2014 May 15;2(3). pii: e00358-14.
873	SP2LAU	Draft	Lebanon			EMM108.0,EMM174.1	EMM108.0	D4	ST304	Tokajian S Genome Announc. 2014 May 15;2(3). pii: e00358-14.
874	SP3LAU	Draft	Lebanon			EMM89.0,EMM203.3	EMM89.0	E4	ST101	Tokajian S Genome Announc. 2014 May 15;2(3). pii: e00358-14.
875	SP4LAU	Draft	Lebanon			EMM28.0,	EMM28.0	E4	ST52	Tokajian S Genome Announc. 2014 May 15;2(3). pii: e00358-14.
876	SP5LAU	Draft	Lebanon			EMM1.0,	EMM1.0	A-C3	ST28	Tokajian S Genome Announc. 2014 May 15;2(3). pii: e00358-14.
877	SP6LAU	Draft	Lebanon			EMM89.0,EMM203.3	EMM89.0	E4	ST101	Tokajian S Genome Announc. 2014 May 15;2(3). pii: e00358-14.
878	SP7LAU	Draft	Lebanon			EMM156.0,EMM22.0	EMM22.0	E4	ST46	Tokajian S Genome Announc. 2014 May 15;2(3). pii: e00358-14.
879	SP8LAU	Draft	Lebanon			EMM85.0,EMM141.0	EMM85.0	E6	ST109	Tokajian S Genome Announc. 2014 May 15;2(3). pii: e00358-14.

## Sheet: Wallace coeff coding regions
		ciaR	ciaH	covR	covS	fasB	fasC	fasA	irr	ihk	liaF	liaS	liaR	spy0873	sptR	sptS	srtR	srtS	spy1553	spy1556	spy1106	spy1107	spy1061	spy1062	silA	silB	salR	salK	trxR	trxS	trxT	vicR	vicK	emm-type	emm-cluster	emm-pattern
	ciaR		0.2	0.107	0.084	0.083	0.077	0.079	0.069	0.078	0.067	0.076	0.112	0.096	0.087	0.078	0.1	0.126	0.079	0.081	0.117	0.063	0.076	0.109	0	0	0.153	0.075	0.08	0.074	0.063	0.102	0.093	0.074	0.066	0.039
			(0.171-0.229)	(0.077-0.136)	(0.072-0.096)	(0.073-0.093)	(0.069-0.086)	(0.065-0.094)	(0.059-0.079)	(0.070-0.085)	(0.003-0.131)	(0.051-0.102)	(0.094-0.129)	(0.077-0.114)	(0.069-0.105)	(0.069-0.088)	(0.057-0.144)	(0.072-0.180)	(0.071-0.086)	(0.073-0.089)	(0.096-0.139)	(0.057-0.069)	(0.069-0.083)	(0.087-0.130)	(0.000-0.067)	(0.000-0.086)	(0.112-0.194)	(0.067-0.084)	(0.073-0.088)	(0.067-0.081)	(0.046-0.081)	(0.089-0.114)	(0.081-0.105)	(0.067-0.081)	(0.048-0.085)	(0.000-0.079)
	ciaH	0.627		0.213	0.238	0.235	0.224	0.274	0.22	0.221	0.158	0.243	0.249	0.298	0.232	0.245	0.318	0.424	0.229	0.235	0.256	0.191	0.218	0.224	0.096	0.076	0.282	0.264	0.249	0.224	0.247	0.29	0.271	0.226	0.22	0.248
		(0.574-0.681)		(0.191-0.235)	(0.216-0.259)	(0.218-0.252)	(0.209-0.240)	(0.250-0.298)	(0.203-0.237)	(0.205-0.238)	(0.092-0.223)	(0.213-0.273)	(0.229-0.269)	(0.267-0.330)	(0.211-0.254)	(0.229-0.262)	(0.268-0.368)	(0.362-0.486)	(0.215-0.243)	(0.220-0.250)	(0.233-0.279)	(0.178-0.205)	(0.203-0.234)	(0.202-0.246)	(0.030-0.162)	(0.000-0.165)	(0.239-0.325)	(0.240-0.288)	(0.234-0.263)	(0.209-0.239)	(0.228-0.267)	(0.270-0.309)	(0.250-0.292)	(0.211-0.240)	(0.200-0.240)	(0.204-0.291)
	covR	0.059	0.038		0.082	0.045	0.042	0.098	0.073	0.044	0.191	0.075	0.092	0.035	0.124	0.056	0.052	0.001	0.046	0.062	0.051	0.043	0.045	0.039	0.035	0.01	0	0.043	0.056	0.047	0.066	0.055	0.059	0.043	0.037	0
		(0.043-0.076)	(0.031-0.044)		(0.069-0.095)	(0.038-0.052)	(0.034-0.049)	(0.074-0.122)	(0.051-0.094)	(0.038-0.049)	(0.099-0.282)	(0.041-0.108)	(0.073-0.111)	(0.023-0.048)	(0.092-0.156)	(0.048-0.064)	(0.010-0.093)	(0.000-0.055)	(0.040-0.051)	(0.051-0.073)	(0.043-0.059)	(0.036-0.050)	(0.039-0.051)	(0.027-0.050)	(0.000-0.141)	(0.000-0.124)	(0.000-0.018)	(0.037-0.050)	(0.049-0.063)	(0.041-0.053)	(0.039-0.092)	(0.045-0.065)	(0.048-0.071)	(0.037-0.049)	(0.023-0.051)	(0.000-0.037)
	covS	0.245	0.222	0.433		0.224	0.22	0.259	0.231	0.213	0.249	0.232	0.3	0.275	0.311	0.233	0.345	0.309	0.227	0.238	0.248	0.198	0.218	0.2	0.249	0.099	0.185	0.221	0.247	0.218	0.263	0.25	0.244	0.223	0.283	0.248
		(0.219-0.271)	(0.205-0.239)	(0.387-0.479)		(0.207-0.240)	(0.202-0.238)	(0.235-0.282)	(0.208-0.254)	(0.197-0.228)	(0.174-0.323)	(0.208-0.255)	(0.275-0.326)	(0.250-0.301)	(0.280-0.343)	(0.217-0.248)	(0.284-0.407)	(0.242-0.375)	(0.212-0.242)	(0.222-0.254)	(0.229-0.268)	(0.183-0.213)	(0.204-0.233)	(0.182-0.218)	(0.167-0.332)	(0.005-0.192)	(0.159-0.211)	(0.205-0.238)	(0.231-0.262)	(0.203-0.233)	(0.238-0.288)	(0.231-0.270)	(0.227-0.261)	(0.207-0.238)	(0.256-0.309)	(0.205-0.292)
	fasB	0.265	0.24	0.261	0.245		0.303	0.377	0.235	0.231	0.253	0.268	0.282	0.274	0.269	0.276	0.29	0.252	0.247	0.251	0.258	0.221	0.236	0.262	0.388	0.389	0.282	0.247	0.262	0.235	0.266	0.279	0.256	0.246	0.312	0.436
		(0.239-0.291)	(0.220-0.261)	(0.226-0.295)	(0.226-0.264)		(0.285-0.322)	(0.352-0.402)	(0.217-0.254)	(0.213-0.249)	(0.193-0.313)	(0.242-0.293)	(0.260-0.304)	(0.254-0.295)	(0.243-0.294)	(0.258-0.294)	(0.253-0.328)	(0.211-0.293)	(0.230-0.264)	(0.233-0.270)	(0.238-0.278)	(0.204-0.238)	(0.219-0.254)	(0.237-0.288)	(0.301-0.475)	(0.299-0.480)	(0.245-0.318)	(0.229-0.265)	(0.245-0.280)	(0.217-0.253)	(0.241-0.292)	(0.258-0.299)	(0.237-0.276)	(0.228-0.264)	(0.283-0.340)	(0.371-0.502)
	fasC	0.273	0.253	0.265	0.266	0.334		0.377	0.298	0.265	0.568	0.291	0.315	0.291	0.341	0.308	0.324	0.285	0.275	0.286	0.277	0.247	0.272	0.248	0.212	0.181	0.304	0.288	0.304	0.268	0.289	0.3	0.301	0.281	0.3	0.233
		(0.247-0.298)	(0.232-0.274)	(0.226-0.304)	(0.243-0.289)	(0.310-0.358)		(0.351-0.404)	(0.273-0.323)	(0.243-0.287)	(0.486-0.650)	(0.260-0.322)	(0.287-0.343)	(0.266-0.315)	(0.309-0.373)	(0.283-0.333)	(0.266-0.382)	(0.225-0.345)	(0.252-0.298)	(0.263-0.309)	(0.254-0.300)	(0.224-0.271)	(0.249-0.296)	(0.224-0.273)	(0.129-0.296)	(0.090-0.272)	(0.263-0.346)	(0.267-0.309)	(0.280-0.327)	(0.246-0.290)	(0.260-0.317)	(0.277-0.324)	(0.277-0.325)	(0.257-0.304)	(0.276-0.323)	(0.183-0.282)
	fasA	0.09	0.099	0.202	0.1	0.133	0.121		0.098	0.091	0.304	0.109	0.111	0.106	0.127	0.107	0.071	0.026	0.098	0.1	0.11	0.087	0.092	0.113	0.183	0.175	0.113	0.097	0.104	0.093	0.159	0.109	0.122	0.095	0.144	0.215
		(0.072-0.107)	(0.086-0.112)	(0.161-0.243)	(0.087-0.113)	(0.119-0.148)	(0.107-0.135)		(0.081-0.115)	(0.081-0.101)	(0.223-0.386)	(0.077-0.140)	(0.098-0.124)	(0.089-0.124)	(0.097-0.158)	(0.095-0.119)	(0.046-0.097)	(0.000-0.062)	(0.087-0.109)	(0.089-0.112)	(0.097-0.124)	(0.077-0.098)	(0.081-0.103)	(0.095-0.130)	(0.095-0.272)	(0.074-0.276)	(0.080-0.147)	(0.086-0.108)	(0.094-0.115)	(0.083-0.103)	(0.132-0.186)	(0.096-0.123)	(0.106-0.139)	(0.084-0.106)	(0.120-0.167)	(0.149-0.282)
	irr	0.148	0.151	0.284	0.17	0.158	0.182	0.186		0.182	0.286	0.199	0.187	0.177	0.206	0.171	0.11	0.06	0.172	0.204	0.178	0.157	0.172	0.138	0.049	0.063	0.189	0.162	0.188	0.165	0.187	0.177	0.173	0.187	0.159	0.065
		(0.129-0.167)	(0.136-0.167)	(0.220-0.348)	(0.152-0.188)	(0.141-0.175)	(0.163-0.200)	(0.161-0.211)		(0.166-0.197)	(0.186-0.387)	(0.162-0.235)	(0.166-0.208)	(0.160-0.194)	(0.175-0.236)	(0.154-0.188)	(0.084-0.136)	(0.024-0.097)	(0.154-0.189)	(0.179-0.230)	(0.158-0.198)	(0.140-0.174)	(0.155-0.189)	(0.120-0.156)	(0.000-0.153)	(0.000-0.183)	(0.146-0.232)	(0.146-0.178)	(0.171-0.205)	(0.150-0.181)	(0.156-0.217)	(0.159-0.195)	(0.157-0.190)	(0.171-0.204)	(0.140-0.178)	(0.035-0.094)
	ihk	0.592	0.539	0.605	0.555	0.55	0.572	0.616	0.645		0.711	0.632	0.635	0.61	0.632	0.588	0.58	0.482	0.626	0.594	0.584	0.536	0.606	0.569	0.557	0.478	0.588	0.549	0.606	0.592	0.579	0.595	0.616	0.604	0.642	0.637
		(0.562-0.623)	(0.512-0.567)	(0.571-0.638)	(0.532-0.578)	(0.523-0.578)	(0.549-0.595)	(0.595-0.636)	(0.627-0.662)		(0.638-0.783)	(0.608-0.655)	(0.611-0.660)	(0.592-0.628)	(0.602-0.662)	(0.568-0.607)	(0.543-0.617)	(0.436-0.529)	(0.588-0.663)	(0.576-0.612)	(0.566-0.601)	(0.506-0.565)	(0.572-0.640)	(0.547-0.591)	(0.473-0.642)	(0.388-0.568)	(0.556-0.619)	(0.522-0.575)	(0.589-0.623)	(0.560-0.625)	(0.552-0.605)	(0.572-0.619)	(0.593-0.638)	(0.587-0.622)	(0.623-0.661)	(0.594-0.680)
	liaF	0.013	0.009	0.065	0.016	0.015	0.03	0.05	0.025	0.017		0.021	0.034	0.013	0.045	0.013	0.023	0.014	0.018	0.022	0.017	0.014	0.014	0	0	0	0.051	0.019	0.018	0.018	0.021	0.009	0.023	0.014	0.013	0
		(0.000-0.027)	(0.004-0.015)	(0.023-0.107)	(0.009-0.023)	(0.009-0.021)	(0.021-0.040)	(0.031-0.070)	(0.011-0.039)	(0.014-0.021)		(0.000-0.044)	(0.022-0.047)	(0.003-0.023)	(0.021-0.068)	(0.009-0.018)	(0.000-0.064)	(0.000-0.066)	(0.014-0.021)	(0.016-0.028)	(0.012-0.022)	(0.009-0.019)	(0.011-0.017)	(0.000-0.008)	(0.000-0.085)	(0.000-0.097)	(0.016-0.086)	(0.013-0.025)	(0.015-0.022)	(0.015-0.022)	(0.002-0.040)	(0.004-0.014)	(0.016-0.031)	(0.011-0.017)	(0.001-0.026)	(0.000-0.040)
	liaS	0.056	0.057	0.1	0.059	0.062	0.061	0.071	0.068	0.061	0.084		0.117	0.098	0.195	0.069	0.069	0.084	0.063	0.068	0.062	0.054	0.061	0.062	0.344	0.333	0.02	0.058	0.074	0.065	0.07	0.078	0.066	0.069	0.067	0.086
		(0.036-0.077)	(0.048-0.066)	(0.056-0.144)	(0.050-0.067)	(0.053-0.070)	(0.052-0.070)	(0.049-0.093)	(0.053-0.083)	(0.054-0.068)	(0.010-0.159)		(0.099-0.134)	(0.073-0.123)	(0.154-0.235)	(0.060-0.078)	(0.027-0.111)	(0.024-0.143)	(0.056-0.071)	(0.059-0.076)	(0.054-0.071)	(0.046-0.062)	(0.054-0.068)	(0.045-0.078)	(0.242-0.446)	(0.221-0.445)	(0.000-0.040)	(0.050-0.065)	(0.066-0.083)	(0.057-0.072)	(0.053-0.088)	(0.068-0.088)	(0.057-0.074)	(0.059-0.078)	(0.047-0.088)	(0.032-0.140)
	liaR	0.166	0.118	0.247	0.153	0.131	0.133	0.146	0.129	0.124	0.271	0.235		0.156	0.185	0.202	0.279	0.233	0.133	0.141	0.134	0.114	0.125	0.129	0	0	0.17	0.116	0.151	0.133	0.175	0.142	0.156	0.127	0.165	0.25
		(0.140-0.192)	(0.105-0.131)	(0.200-0.294)	(0.139-0.167)	(0.118-0.144)	(0.120-0.146)	(0.128-0.164)	(0.113-0.146)	(0.114-0.134)	(0.193-0.349)	(0.203-0.267)		(0.136-0.175)	(0.161-0.209)	(0.173-0.232)	(0.232-0.325)	(0.177-0.290)	(0.122-0.144)	(0.128-0.153)	(0.123-0.146)	(0.104-0.124)	(0.115-0.135)	(0.111-0.147)	(0.000-0.067)	(0.000-0.074)	(0.127-0.214)	(0.105-0.127)	(0.137-0.165)	(0.119-0.147)	(0.150-0.200)	(0.128-0.156)	(0.140-0.172)	(0.117-0.136)	(0.141-0.190)	(0.204-0.296)
	spy0873	0.129	0.129	0.087	0.127	0.116	0.111	0.127	0.111	0.108	0.091	0.179	0.142		0.23	0.199	0.062	0.066	0.115	0.127	0.122	0.105	0.115	0.093	0.162	0.19	0.117	0.111	0.122	0.111	0.086	0.131	0.127	0.114	0.144	0.216
		(0.105-0.154)	(0.113-0.145)	(0.057-0.116)	(0.112-0.143)	(0.104-0.128)	(0.101-0.122)	(0.107-0.148)	(0.097-0.125)	(0.097-0.120)	(0.030-0.153)	(0.138-0.221)	(0.126-0.157)		(0.209-0.252)	(0.184-0.214)	(0.036-0.088)	(0.027-0.105)	(0.105-0.125)	(0.115-0.138)	(0.109-0.135)	(0.095-0.116)	(0.104-0.126)	(0.077-0.108)	(0.072-0.252)	(0.089-0.292)	(0.090-0.144)	(0.101-0.122)	(0.112-0.133)	(0.101-0.121)	(0.072-0.099)	(0.119-0.144)	(0.114-0.139)	(0.102-0.126)	(0.116-0.172)	(0.158-0.275)
	sptR	0.08	0.068	0.205	0.098	0.077	0.088	0.103	0.088	0.076	0.217	0.241	0.114	0.156		0.132	0.118	0.109	0.079	0.09	0.081	0.068	0.076	0.057	0.358	0.315	0.049	0.069	0.097	0.084	0.109	0.079	0.081	0.077	0.084	0.039
		(0.062-0.097)	(0.060-0.076)	(0.151-0.259)	(0.084-0.111)	(0.066-0.087)	(0.076-0.101)	(0.078-0.128)	(0.071-0.104)	(0.067-0.085)	(0.131-0.303)	(0.192-0.290)	(0.097-0.131)	(0.141-0.171)		(0.119-0.146)	(0.074-0.161)	(0.052-0.166)	(0.070-0.089)	(0.079-0.100)	(0.070-0.093)	(0.059-0.078)	(0.067-0.085)	(0.044-0.071)	(0.262-0.453)	(0.214-0.415)	(0.027-0.072)	(0.060-0.078)	(0.086-0.107)	(0.075-0.093)	(0.080-0.137)	(0.068-0.089)	(0.072-0.091)	(0.068-0.086)	(0.071-0.097)	(0.000-0.088)
	sptS	0.322	0.322	0.417	0.327	0.354	0.358	0.389	0.326	0.316	0.288	0.384	0.559	0.605	0.594		0.333	0.255	0.341	0.371	0.343	0.298	0.32	0.344	0.262	0.184	0.534	0.341	0.387	0.345	0.37	0.371	0.369	0.332	0.382	0.502
		(0.293-0.352)	(0.299-0.344)	(0.379-0.454)	(0.305-0.348)	(0.332-0.376)	(0.338-0.378)	(0.365-0.413)	(0.307-0.345)	(0.297-0.336)	(0.231-0.345)	(0.347-0.420)	(0.514-0.604)	(0.570-0.640)	(0.551-0.637)		(0.295-0.372)	(0.208-0.303)	(0.319-0.362)	(0.347-0.394)	(0.325-0.361)	(0.277-0.318)	(0.299-0.341)	(0.317-0.370)	(0.208-0.315)	(0.128-0.240)	(0.481-0.588)	(0.319-0.363)	(0.360-0.414)	(0.316-0.373)	(0.342-0.398)	(0.347-0.396)	(0.348-0.391)	(0.313-0.351)	(0.350-0.413)	(0.464-0.541)
	srtR	0.04	0.04	0.037	0.047	0.036	0.036	0.025	0.02	0.03	0.049	0.037	0.074	0.018	0.051	0.032		0.839	0.035	0.033	0.045	0.028	0.033	0.039	0	0	0.044	0.038	0.037	0.03	0.058	0.034	0.046	0.031	0.062	0.004
		(0.021-0.059)	(0.031-0.049)	(0.002-0.072)	(0.034-0.060)	(0.029-0.043)	(0.026-0.046)	(0.013-0.037)	(0.012-0.028)	(0.026-0.035)	(0.000-0.126)	(0.012-0.062)	(0.058-0.090)	(0.009-0.028)	(0.029-0.073)	(0.026-0.039)		(0.827-0.852)	(0.029-0.041)	(0.027-0.038)	(0.035-0.054)	(0.022-0.033)	(0.028-0.038)	(0.021-0.057)	(0.000-0.080)	(0.000-0.098)	(0.008-0.079)	(0.030-0.046)	(0.032-0.043)	(0.025-0.034)	(0.037-0.078)	(0.025-0.043)	(0.038-0.055)	(0.027-0.036)	(0.038-0.085)	(0.000-0.041)
	srtS	0.04	0.043	0	0.033	0.025	0.026	0.007	0.009	0.02	0.024	0.036	0.05	0.015	0.038	0.02	0.67		0.024	0.022	0.035	0.017	0.021	0.034	0	0	0.052	0.035	0.025	0.02	0.043	0.024	0.031	0.02	0.04	0
		(0.020-0.060)	(0.033-0.053)	(0.000-0.034)	(0.022-0.045)	(0.019-0.031)	(0.017-0.034)	(0.000-0.018)	(0.002-0.016)	(0.017-0.023)	(0.000-0.100)	(0.008-0.063)	(0.035-0.065)	(0.005-0.025)	(0.017-0.059)	(0.014-0.025)	(0.607-0.732)		(0.020-0.028)	(0.018-0.026)	(0.025-0.045)	(0.013-0.022)	(0.018-0.025)	(0.016-0.052)	(0.000-0.083)	(0.000-0.103)	(0.014-0.090)	(0.025-0.044)	(0.022-0.029)	(0.017-0.023)	(0.022-0.063)	(0.016-0.032)	(0.023-0.038)	(0.017-0.023)	(0.020-0.060)	(0.000-0.033)
	spy1553	0.598	0.555	0.625	0.589	0.586	0.592	0.655	0.606	0.623	0.715	0.649	0.681	0.647	0.659	0.63	0.67	0.571		0.714	0.633	0.565	0.622	0.646	0.59	0.53	0.655	0.573	0.661	0.645	0.682	0.651	0.644	0.61	0.661	0.677
		(0.563-0.633)	(0.523-0.586)	(0.594-0.657)	(0.559-0.620)	(0.553-0.619)	(0.566-0.618)	(0.630-0.681)	(0.584-0.628)	(0.584-0.662)	(0.655-0.775)	(0.624-0.675)	(0.661-0.700)	(0.626-0.667)	(0.636-0.682)	(0.609-0.651)	(0.636-0.704)	(0.526-0.615)		(0.694-0.733)	(0.609-0.657)	(0.535-0.595)	(0.587-0.656)	(0.617-0.674)	(0.525-0.654)	(0.456-0.604)	(0.619-0.690)	(0.544-0.602)	(0.642-0.680)	(0.608-0.681)	(0.654-0.711)	(0.631-0.670)	(0.623-0.666)	(0.589-0.631)	(0.638-0.683)	(0.637-0.717)
	spy1556	0.362	0.335	0.5	0.363	0.35	0.362	0.396	0.424	0.347	0.532	0.411	0.422	0.418	0.438	0.403	0.369	0.311	0.419		0.385	0.33	0.347	0.343	0.235	0.151	0.368	0.365	0.402	0.354	0.433	0.393	0.4	0.371	0.396	0.402
		(0.332-0.392)	(0.310-0.360)	(0.449-0.551)	(0.337-0.390)	(0.323-0.378)	(0.335-0.389)	(0.367-0.426)	(0.385-0.463)	(0.321-0.374)	(0.469-0.596)	(0.377-0.445)	(0.395-0.450)	(0.391-0.446)	(0.408-0.467)	(0.380-0.427)	(0.339-0.400)	(0.282-0.341)	(0.392-0.447)		(0.358-0.412)	(0.302-0.358)	(0.318-0.376)	(0.314-0.373)	(0.172-0.297)	(0.079-0.223)	(0.336-0.400)	(0.338-0.392)	(0.375-0.429)	(0.328-0.380)	(0.392-0.475)	(0.366-0.419)	(0.375-0.426)	(0.343-0.400)	(0.368-0.424)	(0.350-0.455)
	spy1106	0.462	0.322	0.365	0.335	0.318	0.31	0.384	0.326	0.301	0.357	0.333	0.356	0.355	0.35	0.329	0.444	0.437	0.328	0.34		0.323	0.312	0.367	0.38	0.185	0.44	0.298	0.341	0.308	0.356	0.369	0.345	0.321	0.393	0.326
		(0.414-0.511)	(0.293-0.350)	(0.328-0.401)	(0.303-0.366)	(0.289-0.346)	(0.281-0.338)	(0.353-0.415)	(0.294-0.359)	(0.274-0.329)	(0.292-0.422)	(0.300-0.366)	(0.327-0.384)	(0.322-0.388)	(0.316-0.384)	(0.301-0.358)	(0.401-0.487)	(0.385-0.489)	(0.300-0.356)	(0.310-0.369)		(0.296-0.350)	(0.284-0.341)	(0.332-0.402)	(0.295-0.464)	(0.123-0.246)	(0.386-0.493)	(0.273-0.323)	(0.312-0.369)	(0.282-0.334)	(0.320-0.392)	(0.339-0.398)	(0.318-0.372)	(0.292-0.350)	(0.353-0.433)	(0.269-0.382)
	spy1107	0.345	0.334	0.427	0.37	0.377	0.383	0.422	0.399	0.384	0.419	0.4	0.419	0.427	0.407	0.397	0.384	0.299	0.407	0.405	0.448		0.397	0.393	0.315	0.248	0.412	0.359	0.417	0.379	0.399	0.415	0.421	0.398	0.425	0.476
		(0.318-0.372)	(0.313-0.355)	(0.380-0.474)	(0.349-0.391)	(0.356-0.399)	(0.364-0.402)	(0.403-0.442)	(0.378-0.420)	(0.361-0.406)	(0.323-0.515)	(0.369-0.431)	(0.396-0.441)	(0.403-0.450)	(0.381-0.433)	(0.381-0.412)	(0.338-0.429)	(0.241-0.356)	(0.387-0.426)	(0.390-0.419)	(0.437-0.460)		(0.379-0.415)	(0.376-0.411)	(0.212-0.418)	(0.128-0.368)	(0.372-0.452)	(0.338-0.380)	(0.403-0.431)	(0.358-0.399)	(0.377-0.422)	(0.394-0.436)	(0.403-0.440)	(0.384-0.411)	(0.401-0.449)	(0.411-0.540)
	spy1061	0.598	0.55	0.639	0.589	0.582	0.609	0.641	0.629	0.626	0.595	0.653	0.663	0.671	0.652	0.615	0.654	0.535	0.645	0.613	0.625	0.573		0.686	0.642	0.558	0.619	0.573	0.63	0.6	0.638	0.625	0.638	0.621	0.657	0.666
		(0.564-0.631)	(0.520-0.579)	(0.606-0.672)	(0.557-0.621)	(0.553-0.611)	(0.584-0.634)	(0.616-0.665)	(0.604-0.654)	(0.589-0.664)	(0.540-0.650)	(0.621-0.684)	(0.640-0.687)	(0.649-0.693)	(0.628-0.677)	(0.593-0.636)	(0.621-0.687)	(0.492-0.578)	(0.613-0.678)	(0.590-0.636)	(0.603-0.647)	(0.544-0.601)		(0.664-0.709)	(0.581-0.704)	(0.491-0.626)	(0.587-0.651)	(0.545-0.601)	(0.608-0.651)	(0.566-0.635)	(0.614-0.662)	(0.599-0.650)	(0.613-0.662)	(0.599-0.643)	(0.630-0.684)	(0.630-0.701)
	spy1062	0.155	0.102	0.1	0.098	0.117	0.101	0.142	0.092	0.107	0	0.119	0.124	0.098	0.089	0.12	0.142	0.152	0.121	0.11	0.133	0.103	0.124		0.077	0.056	0.174	0.11	0.116	0.105	0.221	0.115	0.119	0.114	0.097	0.051
		(0.129-0.182)	(0.090-0.114)	(0.079-0.121)	(0.084-0.111)	(0.102-0.132)	(0.088-0.113)	(0.119-0.165)	(0.079-0.105)	(0.095-0.118)	(0.000-0.050)	(0.096-0.143)	(0.108-0.139)	(0.083-0.113)	(0.073-0.106)	(0.105-0.134)	(0.090-0.194)	(0.090-0.215)	(0.108-0.135)	(0.097-0.122)	(0.117-0.149)	(0.091-0.115)	(0.113-0.136)		(0.000-0.168)	(0.000-0.155)	(0.138-0.211)	(0.097-0.123)	(0.104-0.128)	(0.093-0.116)	(0.181-0.262)	(0.101-0.130)	(0.106-0.132)	(0.102-0.127)	(0.077-0.117)	(0.010-0.092)
	silA	0	0.004	0.007	0.01	0.014	0.007	0.019	0.003	0.008	0	0.054	0	0.014	0.045	0.007	0	0	0.009	0.006	0.011	0.007	0.009	0.006		0.922	0	0.012	0.012	0.009	0.006	0.012	0.004	0.012	0.024	0.081
		(0.000-0.011)	(0.000-0.008)	(0.000-0.040)	(0.003-0.016)	(0.008-0.020)	(0.002-0.012)	(0.003-0.034)	(0.000-0.012)	(0.006-0.011)	(0.000-0.064)	(0.025-0.082)	(0.000-0.007)	(0.002-0.025)	(0.021-0.069)	(0.004-0.011)	(0.000-0.034)	(0.000-0.044)	(0.006-0.011)	(0.003-0.010)	(0.007-0.015)	(0.003-0.010)	(0.007-0.012)	(0.000-0.018)		(0.914-0.930)	(0.000-0.019)	(0.006-0.019)	(0.009-0.015)	(0.006-0.011)	(0.000-0.020)	(0.004-0.019)	(0.001-0.008)	(0.009-0.015)	(0.011-0.037)	(0.028-0.134)
	silB	0	0.003	0.002	0.004	0.013	0.006	0.017	0.003	0.007	0	0.049	0	0.015	0.037	0.005	0	0	0.008	0.004	0.005	0.005	0.008	0.004	0.867		0	0.013	0.01	0.008	0	0.008	0.002	0.011	0.021	0.094
		(0.000-0.011)	(0.000-0.007)	(0.000-0.035)	(0.000-0.010)	(0.007-0.019)	(0.000-0.011)	(0.001-0.032)	(0.000-0.013)	(0.004-0.009)	(0.000-0.064)	(0.020-0.077)	(0.000-0.007)	(0.003-0.027)	(0.014-0.061)	(0.002-0.008)	(0.000-0.034)	(0.000-0.046)	(0.005-0.010)	(0.000-0.007)	(0.002-0.009)	(0.001-0.009)	(0.005-0.010)	(0.000-0.016)	(0.815-0.919)		(0.000-0.020)	(0.006-0.021)	(0.007-0.013)	(0.005-0.010)	(0.000-0.014)	(0.000-0.015)	(0.000-0.004)	(0.008-0.014)	(0.007-0.034)	(0.040-0.149)
	salR	0.095	0.056	0	0.039	0.055	0.054	0.063	0.055	0.048	0.17	0.017	0.071	0.054	0.033	0.081	0.069	0.103	0.054	0.051	0.07	0.047	0.049	0.076	0	0		0.063	0.056	0.049	0.064	0.065	0.054	0.056	0.068	0.068
		(0.069-0.121)	(0.045-0.067)	(0.000-0.021)	(0.032-0.047)	(0.046-0.064)	(0.045-0.063)	(0.044-0.081)	(0.040-0.069)	(0.043-0.053)	(0.085-0.255)	(0.001-0.032)	(0.053-0.090)	(0.043-0.065)	(0.020-0.046)	(0.068-0.095)	(0.022-0.115)	(0.040-0.166)	(0.048-0.060)	(0.045-0.058)	(0.055-0.084)	(0.041-0.054)	(0.043-0.054)	(0.058-0.094)	(0.000-0.060)	(0.000-0.090)		(0.055-0.070)	(0.050-0.062)	(0.044-0.055)	(0.044-0.084)	(0.054-0.076)	(0.047-0.062)	(0.049-0.063)	(0.050-0.086)	(0.019-0.116)
	salK	0.316	0.353	0.326	0.317	0.322	0.341	0.359	0.315	0.301	0.425	0.327	0.327	0.344	0.315	0.347	0.405	0.458	0.316	0.342	0.317	0.275	0.304	0.322	0.453	0.519	0.419		0.335	0.296	0.337	0.373	0.34	0.316	0.394	0.497
		(0.289-0.343)	(0.322-0.384)	(0.302-0.350)	(0.294-0.339)	(0.301-0.343)	(0.319-0.363)	(0.329-0.389)	(0.294-0.337)	(0.282-0.320)	(0.338-0.512)	(0.299-0.354)	(0.306-0.347)	(0.323-0.365)	(0.293-0.336)	(0.326-0.368)	(0.353-0.457)	(0.388-0.528)	(0.296-0.335)	(0.321-0.364)	(0.299-0.335)	(0.256-0.293)	(0.285-0.323)	(0.292-0.351)	(0.345-0.561)	(0.418-0.619)	(0.383-0.456)		(0.316-0.354)	(0.277-0.315)	(0.304-0.370)	(0.349-0.398)	(0.319-0.362)	(0.296-0.335)	(0.365-0.422)	(0.416-0.578)
	trxR	0.512	0.505	0.644	0.538	0.522	0.549	0.588	0.556	0.506	0.625	0.64	0.647	0.577	0.673	0.601	0.598	0.513	0.554	0.574	0.551	0.486	0.508	0.518	0.64	0.574	0.571	0.51		0.593	0.655	0.581	0.588	0.54	0.562	0.598
		(0.482-0.543)	(0.480-0.531)	(0.607-0.680)	(0.510-0.566)	(0.494-0.550)	(0.526-0.571)	(0.566-0.609)	(0.531-0.580)	(0.482-0.530)	(0.583-0.667)	(0.612-0.668)	(0.627-0.667)	(0.557-0.597)	(0.648-0.699)	(0.579-0.623)	(0.564-0.632)	(0.470-0.556)	(0.530-0.579)	(0.551-0.596)	(0.531-0.570)	(0.461-0.511)	(0.486-0.531)	(0.493-0.542)	(0.576-0.705)	(0.506-0.642)	(0.538-0.605)	(0.484-0.536)		(0.564-0.623)	(0.621-0.688)	(0.555-0.608)	(0.563-0.613)	(0.521-0.560)	(0.536-0.588)	(0.559-0.636)
	trxS	0.571	0.554	0.66	0.578	0.569	0.588	0.636	0.595	0.601	0.751	0.681	0.693	0.636	0.71	0.651	0.581	0.483	0.657	0.614	0.605	0.537	0.59	0.567	0.589	0.541	0.614	0.548	0.721		0.728	0.637	0.634	0.589	0.613	0.565
		(0.539-0.603)	(0.528-0.581)	(0.625-0.695)	(0.552-0.604)	(0.541-0.597)	(0.568-0.608)	(0.617-0.655)	(0.574-0.616)	(0.572-0.631)	(0.698-0.805)	(0.656-0.705)	(0.673-0.713)	(0.616-0.656)	(0.690-0.730)	(0.634-0.668)	(0.549-0.612)	(0.444-0.522)	(0.628-0.687)	(0.595-0.634)	(0.588-0.623)	(0.511-0.562)	(0.563-0.616)	(0.546-0.588)	(0.526-0.652)	(0.472-0.610)	(0.581-0.647)	(0.522-0.574)	(0.701-0.742)		(0.702-0.755)	(0.614-0.660)	(0.611-0.657)	(0.571-0.608)	(0.588-0.638)	(0.524-0.605)
	trxT	0.076	0.095	0.143	0.108	0.1	0.098	0.168	0.104	0.091	0.134	0.114	0.141	0.076	0.142	0.108	0.175	0.161	0.108	0.116	0.108	0.088	0.097	0.186	0.065	0	0.123	0.097	0.123	0.113		0.114	0.115	0.097	0.075	0
		(0.057-0.095)	(0.085-0.105)	(0.094-0.191)	(0.095-0.121)	(0.088-0.112)	(0.087-0.109)	(0.142-0.194)	(0.085-0.123)	(0.081-0.100)	(0.053-0.216)	(0.089-0.140)	(0.122-0.160)	(0.065-0.087)	(0.112-0.172)	(0.096-0.120)	(0.133-0.216)	(0.107-0.216)	(0.096-0.120)	(0.098-0.134)	(0.094-0.122)	(0.077-0.099)	(0.086-0.108)	(0.153-0.219)	(0.000-0.148)	(0.000-0.100)	(0.086-0.160)	(0.085-0.108)	(0.111-0.135)	(0.101-0.124)		(0.100-0.128)	(0.102-0.128)	(0.086-0.108)	(0.057-0.093)	(0.000-0.033)
	vicR	0.218	0.198	0.213	0.183	0.186	0.182	0.207	0.176	0.167	0.098	0.226	0.204	0.208	0.184	0.194	0.183	0.164	0.183	0.188	0.2	0.162	0.169	0.173	0.218	0.153	0.223	0.191	0.195	0.176	0.204		0.31	0.176	0.233	0.258
		(0.190-0.245)	(0.177-0.219)	(0.178-0.248)	(0.164-0.203)	(0.168-0.204)	(0.167-0.197)	(0.185-0.229)	(0.160-0.192)	(0.154-0.180)	(0.050-0.147)	(0.202-0.250)	(0.184-0.223)	(0.189-0.227)	(0.164-0.204)	(0.176-0.211)	(0.151-0.216)	(0.124-0.205)	(0.169-0.198)	(0.172-0.204)	(0.184-0.217)	(0.149-0.176)	(0.156-0.183)	(0.153-0.193)	(0.157-0.279)	(0.093-0.214)	(0.184-0.262)	(0.172-0.210)	(0.180-0.210)	(0.160-0.192)	(0.179-0.229)		(0.285-0.334)	(0.162-0.190)	(0.202-0.264)	(0.201-0.316)
	vicK	0.364	0.338	0.42	0.326	0.313	0.333	0.422	0.315	0.315	0.483	0.347	0.409	0.366	0.347	0.351	0.458	0.378	0.331	0.35	0.342	0.301	0.316	0.326	0.151	0.054	0.341	0.318	0.361	0.32	0.376	0.566		0.328	0.371	0.296
		(0.330-0.397)	(0.312-0.364)	(0.366-0.473)	(0.304-0.349)	(0.292-0.334)	(0.314-0.352)	(0.381-0.464)	(0.296-0.334)	(0.295-0.335)	(0.411-0.556)	(0.319-0.375)	(0.377-0.442)	(0.343-0.390)	(0.325-0.369)	(0.329-0.374)	(0.419-0.498)	(0.332-0.423)	(0.310-0.352)	(0.329-0.371)	(0.323-0.361)	(0.283-0.319)	(0.297-0.334)	(0.304-0.347)	(0.105-0.197)	(0.005-0.104)	(0.307-0.374)	(0.296-0.340)	(0.341-0.380)	(0.298-0.341)	(0.343-0.408)	(0.533-0.598)		(0.311-0.345)	(0.334-0.408)	(0.245-0.347)
	emm-type	0.532	0.518	0.564	0.548	0.553	0.572	0.603	0.626	0.57	0.544	0.67	0.612	0.606	0.606	0.582	0.572	0.453	0.577	0.599	0.587	0.523	0.567	0.577	0.765	0.708	0.644	0.543	0.61	0.547	0.582	0.592	0.604		1	1
		(0.495-0.568)	(0.483-0.553)	(0.529-0.598)	(0.512-0.584)	(0.519-0.588)	(0.540-0.604)	(0.573-0.634)	(0.596-0.657)	(0.536-0.604)	(0.503-0.584)	(0.632-0.708)	(0.581-0.644)	(0.573-0.640)	(0.577-0.635)	(0.553-0.611)	(0.541-0.602)	(0.415-0.491)	(0.546-0.609)	(0.568-0.630)	(0.555-0.618)	(0.492-0.554)	(0.534-0.599)	(0.544-0.610)	(0.727-0.804)	(0.671-0.745)	(0.601-0.687)	(0.511-0.576)	(0.581-0.640)	(0.512-0.583)	(0.551-0.613)	(0.561-0.624)	(0.571-0.637)		(1.000-1.000)	(1.000-1.000)
	emm-cluster	0.063	0.066	0.063	0.091	0.092	0.08	0.12	0.069	0.079	0.068	0.086	0.105	0.1	0.086	0.087	0.146	0.119	0.082	0.084	0.094	0.073	0.078	0.064	0.194	0.178	0.103	0.089	0.083	0.074	0.059	0.103	0.089	0.131		0.92
		(0.046-0.079)	(0.057-0.075)	(0.039-0.087)	(0.078-0.104)	(0.079-0.104)	(0.070-0.090)	(0.098-0.141)	(0.060-0.079)	(0.071-0.088)	(0.003-0.132)	(0.063-0.109)	(0.092-0.117)	(0.083-0.118)	(0.069-0.103)	(0.076-0.098)	(0.114-0.179)	(0.080-0.158)	(0.073-0.090)	(0.074-0.093)	(0.081-0.107)	(0.064-0.082)	(0.070-0.087)	(0.049-0.079)	(0.117-0.270)	(0.097-0.260)	(0.075-0.130)	(0.078-0.099)	(0.074-0.092)	(0.066-0.083)	(0.044-0.074)	(0.088-0.117)	(0.079-0.100)	(0.119-0.143)		(0.902-0.938)
	emm-pattern	0.007	0.015	0	0.016	0.025	0.012	0.036	0.006	0.016	0	0.022	0.031	0.03	0.008	0.023	0.002	0	0.017	0.017	0.015	0.016	0.016	0.007	0.132	0.163	0.02	0.022	0.018	0.014	0	0.023	0.014	0.026	0.183
		(0.000-0.020)	(0.009-0.020)	(0.000-0.024)	(0.010-0.022)	(0.018-0.032)	(0.007-0.018)	(0.017-0.054)	(0.000-0.013)	(0.012-0.019)	(0.000-0.063)	(0.000-0.043)	(0.022-0.040)	(0.017-0.043)	(0.000-0.025)	(0.018-0.028)	(0.000-0.026)	(0.000-0.034)	(0.013-0.020)	(0.012-0.021)	(0.010-0.021)	(0.011-0.022)	(0.012-0.019)	(0.000-0.017)	(0.047-0.216)	(0.074-0.252)	(0.000-0.044)	(0.015-0.029)	(0.014-0.021)	(0.011-0.017)	(0.000-0.011)	(0.015-0.030)	(0.009-0.019)	(0.022-0.030)	(0.161-0.204)
